# Supplementary material
Source: HighWire-hosted journal article supplement (https://erj.ersjournals.com/content/54/3/1901003)
Supplement: inline-supplementary-material-1 [file inline-supplementary-material-1.pdf]

## European Respiratory Society Guideline on Long-term Home Non-Invasive Ventilation for Management of Chronic Obstructive Pulmonary Disease

Appendix. Study comparators in trials included for PICO Question 1.

| <b>Trials<br/>(Author, year)</b> | <b>Comparator*</b>                   |
|----------------------------------|--------------------------------------|
| Duiverman 2008                   | Standard of care                     |
| Köhnlein 2014                    | Standard of care (LTOT if indicated) |
| Eman Shebi 2015                  | Standard of care                     |
| Zhou 2017                        | Standard of care                     |
| Strumpf 1991                     | Standard of care                     |
| Gay 1996                         | Sham NIV                             |
| Kaminski 1999                    | LTOT alone                           |
| Garrod 2000                      | Standard of care                     |
| Casanova 2000                    | Standard of care                     |
| Clini 2002                       | LTOT alone                           |
| Sin 2007                         | Sham NIV                             |
| McEvoy 2009                      | LTOT alone                           |
| Bhatt 2013                       | Standard of care                     |

\*Standard of care consists of pharmacological (inhaled and systematic treatments) and if present, nonpharmacological (pulmonary rehabilitation) therapies for the management of COPD. LTOT: Long term oxygen therapy, NIV: Noninvasive ventilation.
