# Supplementary material
Source: HighWire-hosted journal article supplement (https://erj.ersjournals.com/content/54/3/1901003)
Supplement: inline-supplementary-material-2 [file inline-supplementary-material-2.pdf]

## GRADE Evidence Profile – Q1: NIV vs usual care in stable patients with COPD

| Certainty assessment                                                                                                  |                   |                      |                          |              |                      |                      | № of patients  |                 | Effect                    |                                                     | Certainty                                                                                         | Importance |
|-----------------------------------------------------------------------------------------------------------------------|-------------------|----------------------|--------------------------|--------------|----------------------|----------------------|----------------|-----------------|---------------------------|-----------------------------------------------------|---------------------------------------------------------------------------------------------------|------------|
| № of studies                                                                                                          | Study design      | Risk of bias         | Inconsistency            | Indirectness | Imprecision          | Other considerations | Long-term NIV  | usual care      | Relative (95% CI)         | Absolute (95% CI)                                   |                                                                                                   |            |
| Mortality (follow up: range 3 months to 12 months)                                                                    |                   |                      |                          |              |                      |                      |                |                 |                           |                                                     |                                                                                                   |            |
| 13                                                                                                                    | randomised trials | serious <sup>a</sup> | not serious              | not serious  | serious <sup>b</sup> | none                 | 78/422 (18.5%) | 101/415 (24.3%) | RR 0.86<br>(0.58 to 1.27) | 34 fewer per 1,000<br>(from 66 more to 102 fewer)   | <br>LOW        | CRITICAL   |
| Number of Hospitalizations (follow up: range 3 months to 12 months)                                                   |                   |                      |                          |              |                      |                      |                |                 |                           |                                                     |                                                                                                   |            |
| 3                                                                                                                     | randomised trials | serious <sup>a</sup> | not serious <sup>c</sup> | not serious  | serious <sup>b</sup> | none                 | 154            | 154             | -                         | MD 1.26 fewer<br>(2.59 fewer to 0.08 more)          | <br>LOW        | CRITICAL   |
| Quality of Life (higher is better) (follow up: range 3 months to 12 months; assessed with: Multiple validated scales) |                   |                      |                          |              |                      |                      |                |                 |                           |                                                     |                                                                                                   |            |
| 7                                                                                                                     | randomised trials | serious <sup>a</sup> | serious <sup>d</sup>     | not serious  | serious <sup>b</sup> | none                 | 244            | 244             | -                         | SMD 0.49 SD higher<br>(0.01 lower to 0.98 higher)   | <br>VERY LOW   | CRITICAL   |
| Change in Dyspnea Score (assessed with: lower is better)                                                              |                   |                      |                          |              |                      |                      |                |                 |                           |                                                     |                                                                                                   |            |
| 5                                                                                                                     | randomised trials | serious <sup>a</sup> | not serious              | not serious  | not serious          | none                 | 92             | 96              | -                         | SMD 0.51 SD lower<br>(0.95 lower to 0.06 lower)     | <br>MODERATE   | CRITICAL   |
| Change in PaCO2 (follow up: range 3 months to 12 months; assessed with: mmHg)                                         |                   |                      |                          |              |                      |                      |                |                 |                           |                                                     |                                                                                                   |            |
| 12                                                                                                                    | randomised trials | serious <sup>a</sup> | not serious <sup>c</sup> | not serious  | not serious          | none                 | 374            | 373             | -                         | MD 3.37 mmHg lower<br>(5.75 lower to 0.99 lower)    | <br>MODERATE   | IMPORTANT  |
| Change in PaO2 (follow up: range 3 months to 12 months; assessed with: mmHg)                                          |                   |                      |                          |              |                      |                      |                |                 |                           |                                                     |                                                                                                   |            |
| 9                                                                                                                     | randomised trials | serious <sup>a</sup> | not serious              | not serious  | not serious          | none                 | 278            | 277             | -                         | MD 3.09 mmHg higher<br>(1.45 higher to 4.74 higher) | <br>MODERATE | IMPORTANT  |
| Change in FEV1 (follow up: range 3 months to 12 months; assessed with: % or L)                                        |                   |                      |                          |              |                      |                      |                |                 |                           |                                                     |                                                                                                   |            |
| 10                                                                                                                    | randomised trials | serious <sup>a</sup> | not serious              | not serious  | serious <sup>e</sup> | none                 | 366            | 374             | -                         | SMD 0.07 SD higher<br>(0.14 lower to 0.27 higher)   | <br>LOW      | IMPORTANT  |
| Change in FVC (follow up: range 3 months to 12 months; assessed with: & or L)                                         |                   |                      |                          |              |                      |                      |                |                 |                           |                                                     |                                                                                                   |            |
| 8                                                                                                                     | randomised trials | serious <sup>a</sup> | not serious              | not serious  | serious <sup>e</sup> | none                 | 287            | 296             | -                         | SMD 0.1 SD higher<br>(0.06 lower to 0.26 higher)    | <br>LOW      | IMPORTANT  |
| Change in 6 minute walk distance (follow up: range 3 months to 12 months; assessed with: metres)                      |                   |                      |                          |              |                      |                      |                |                 |                           |                                                     |                                                                                                   |            |

| Certainty assessment                                                                                         |                   |                      |               |                      |                      |                      | № of patients  |              | Effect                   |                                                       | Certainty                                                                                       | Importance |
|--------------------------------------------------------------------------------------------------------------|-------------------|----------------------|---------------|----------------------|----------------------|----------------------|----------------|--------------|--------------------------|-------------------------------------------------------|-------------------------------------------------------------------------------------------------|------------|
| № of studies                                                                                                 | Study design      | Risk of bias         | Inconsistency | Indirectness         | Imprecision          | Other considerations | Long-term NIV  | usual care   | Relative (95% CI)        | Absolute (95% CI)                                     |                                                                                                 |            |
| 10                                                                                                           | randomised trials | serious <sup>a</sup> | not serious   | not serious          | not serious          | none                 | 256            | 260          | -                        | MD 32.03 metres higher (10.79 higher to 53.26 higher) | <br>MODERATE | IMPORTANT  |
| Change in Sleep Efficiency (follow up: range 3 months to 12 months)                                          |                   |                      |               |                      |                      |                      |                |              |                          |                                                       |                                                                                                 |            |
| 3                                                                                                            | randomised trials | serious <sup>a</sup> | not serious   | not serious          | serious <sup>f</sup> | none                 | 61             | 65           | -                        | SMD 0.55 SD lower (1.13 lower to 0.03 higher)         | <br>LOW      | IMPORTANT  |
| Minor Adverse Events (follow up: range 3 months to 12 months; assessed with: discomfort, skin break or rash) |                   |                      |               |                      |                      |                      |                |              |                          |                                                       |                                                                                                 |            |
| 3                                                                                                            | randomised trials | serious <sup>a</sup> | not serious   | serious <sup>a</sup> | not serious          | none                 | 27/189 (14.3%) | 0/175 (0.0%) | RR 10.35 (2.45 to 43.71) | 0 fewer per 1,000 (from 0 fewer to 0 fewer)           | <br>LOW      | IMPORTANT  |

CI: Confidence interval; RR: Risk ratio; MD: Mean difference; SMD: Standardised mean difference

Explanations

- a. Most trials unblinded, variable lost-to-follow up which was significant in some included trials.
- b. Wide confidence intervals that do not exclude significant harm.
- c. High Isquared (>70%) however in most included studies point estimate is on the side of benefit.
- d. High Isquared (>70%) and variable effects between studies.
- e. No effect, however confidence intervals don't exclude significant benefit or harm.
- f. Wide confidence intervals that do not exclude benefit.
- g. Varying importance and severity of these minor adverse effects.

## Forest plot 1: Mortality

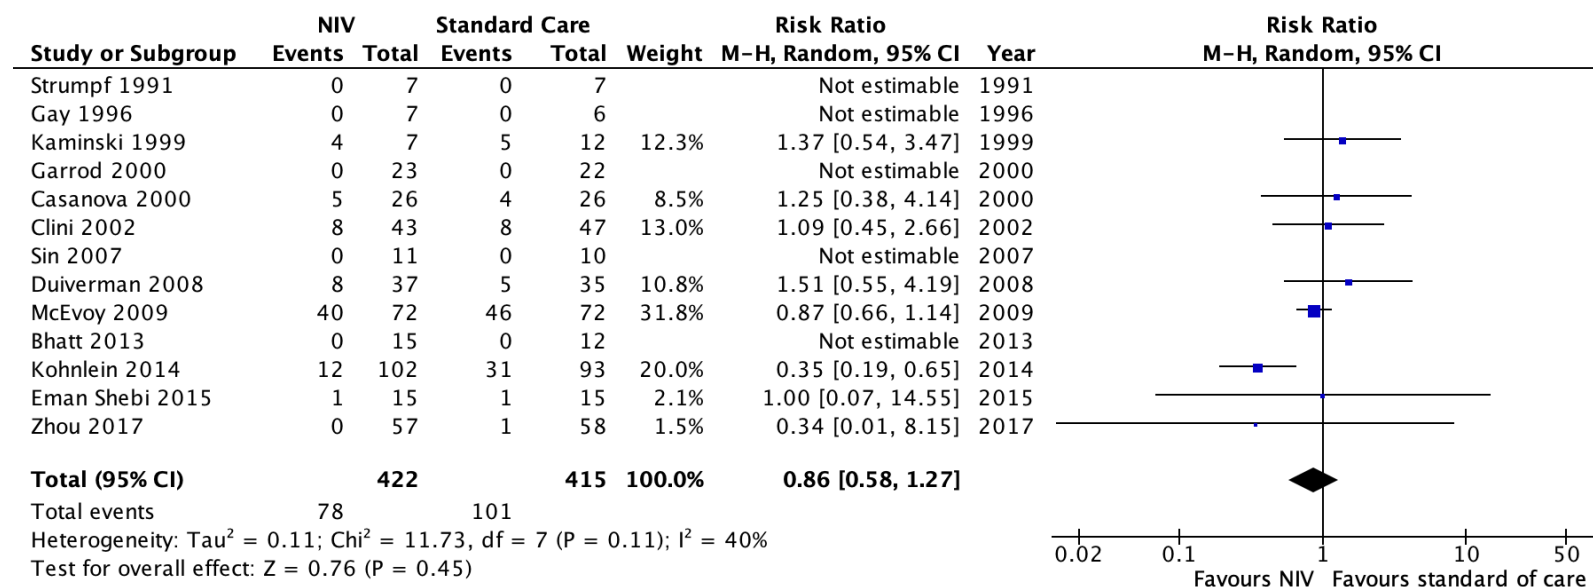

## Forest plot 2: Hospitalizations

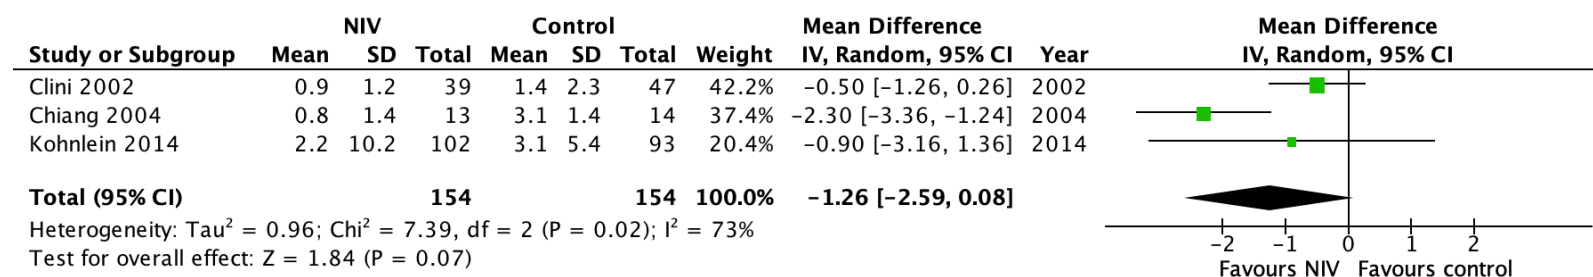

### Forest plot 3: Quality of Life

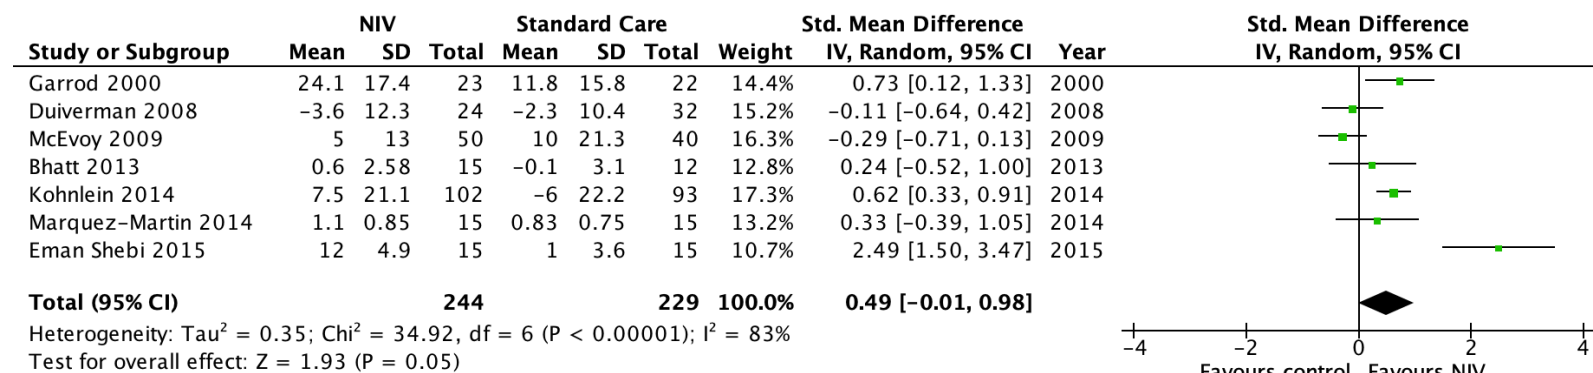

### Forest plot 4: Dyspnea

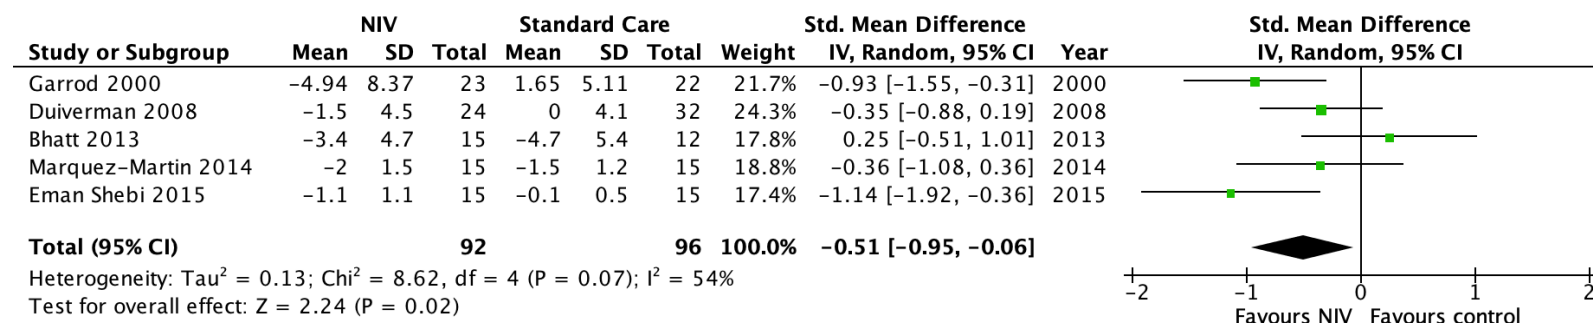

## Forest plot 5: PCO2

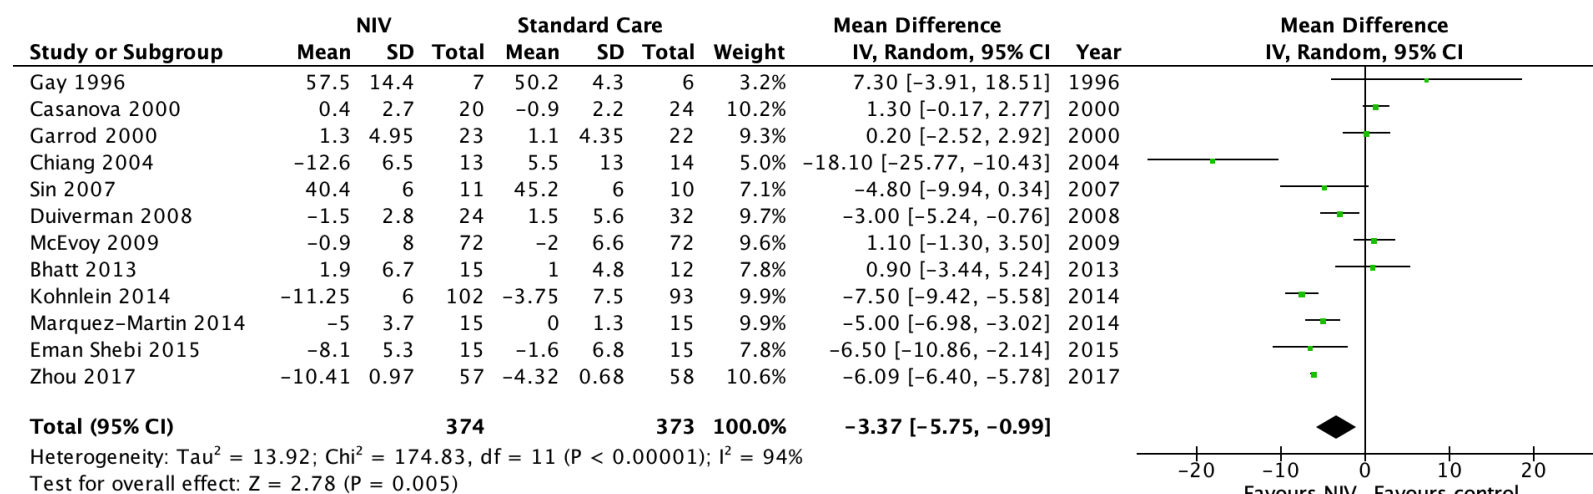

## Forest plot 6: PO2

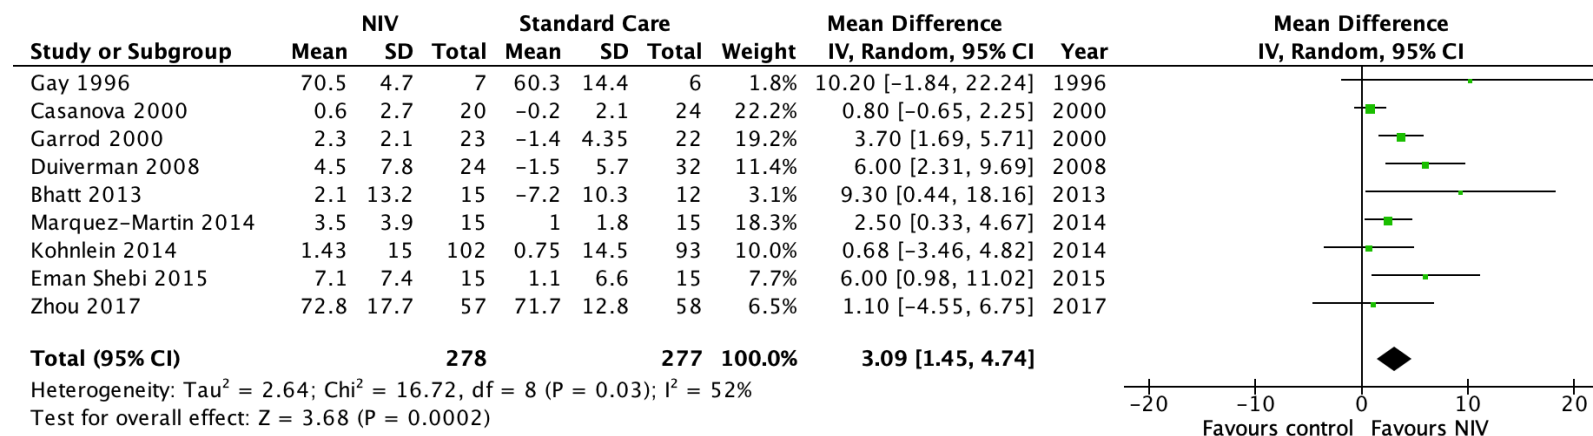

## Forest plot 7: FEV1

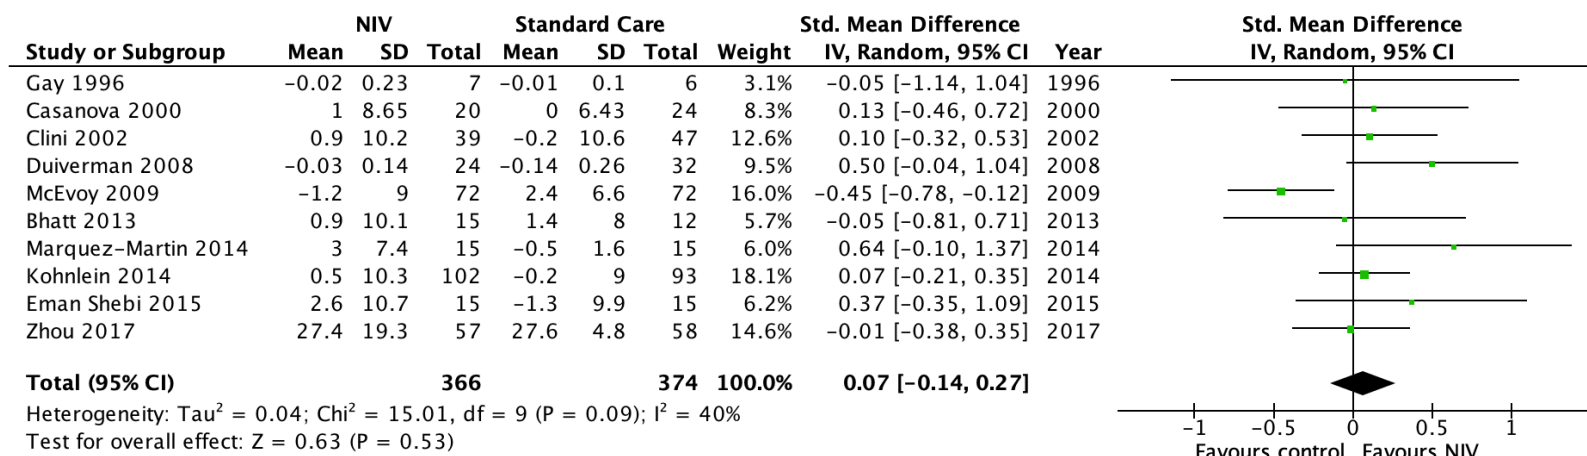

## Forest plot 8: Six minute walk distance

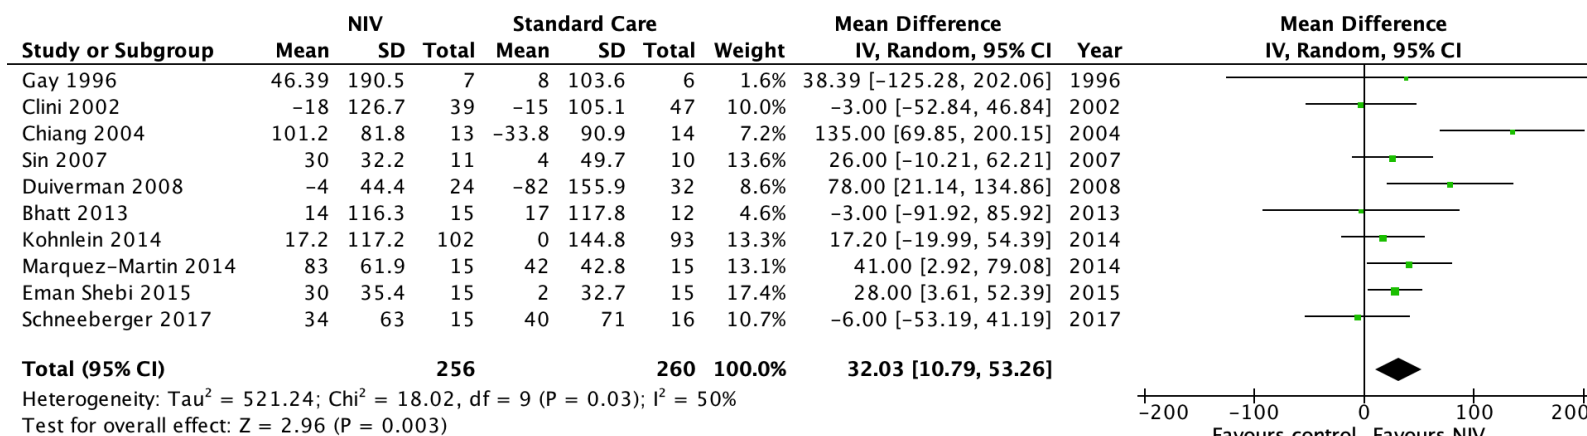

Forest plot 9: Sleep efficiency

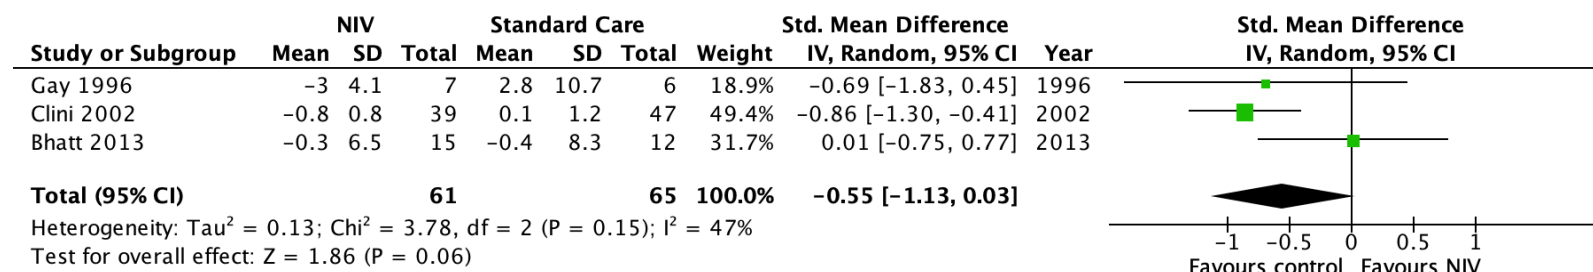

Forest plot 10: Minor adverse events

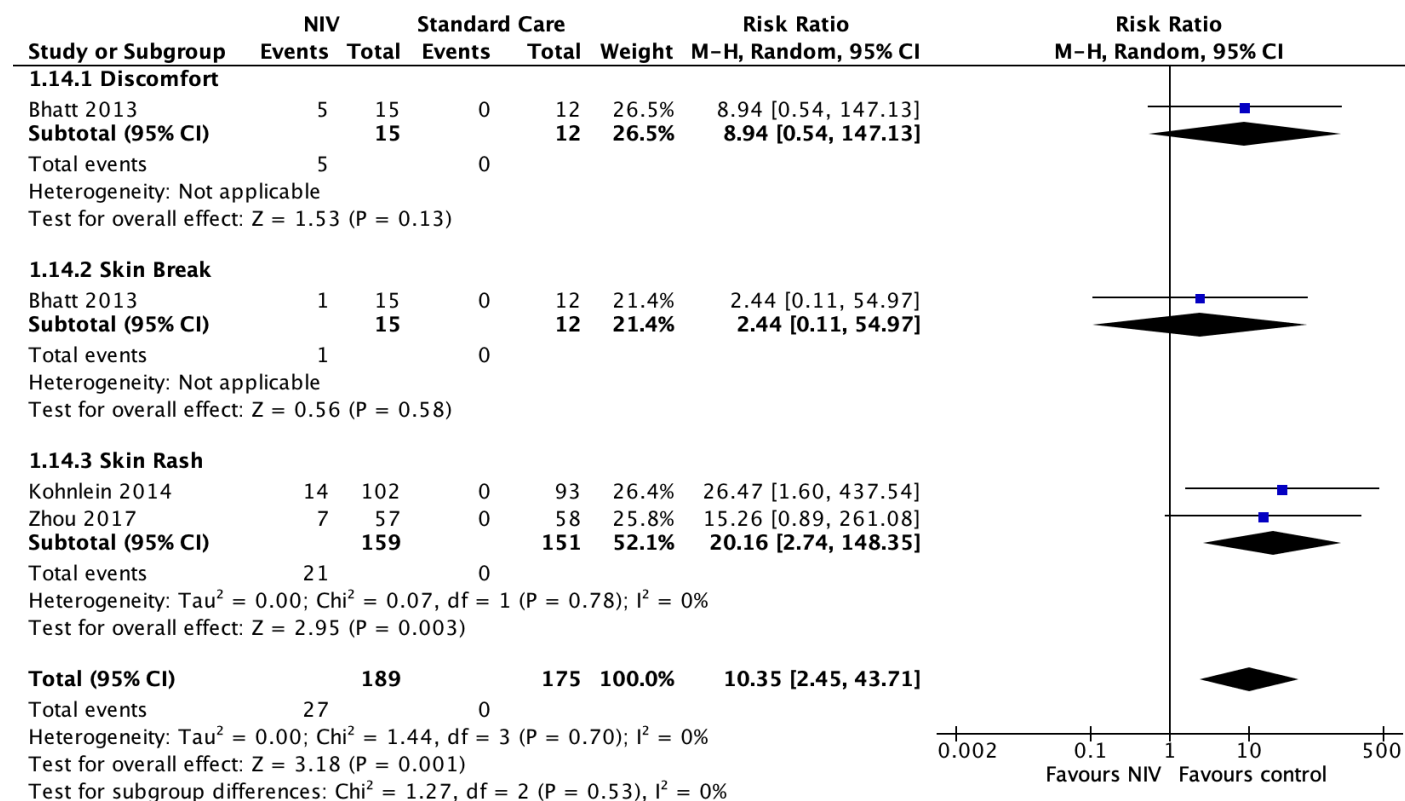

Forest plot 11: Mortality subgroup analysis - targeted PCO2 vs. non-targeted PCO2

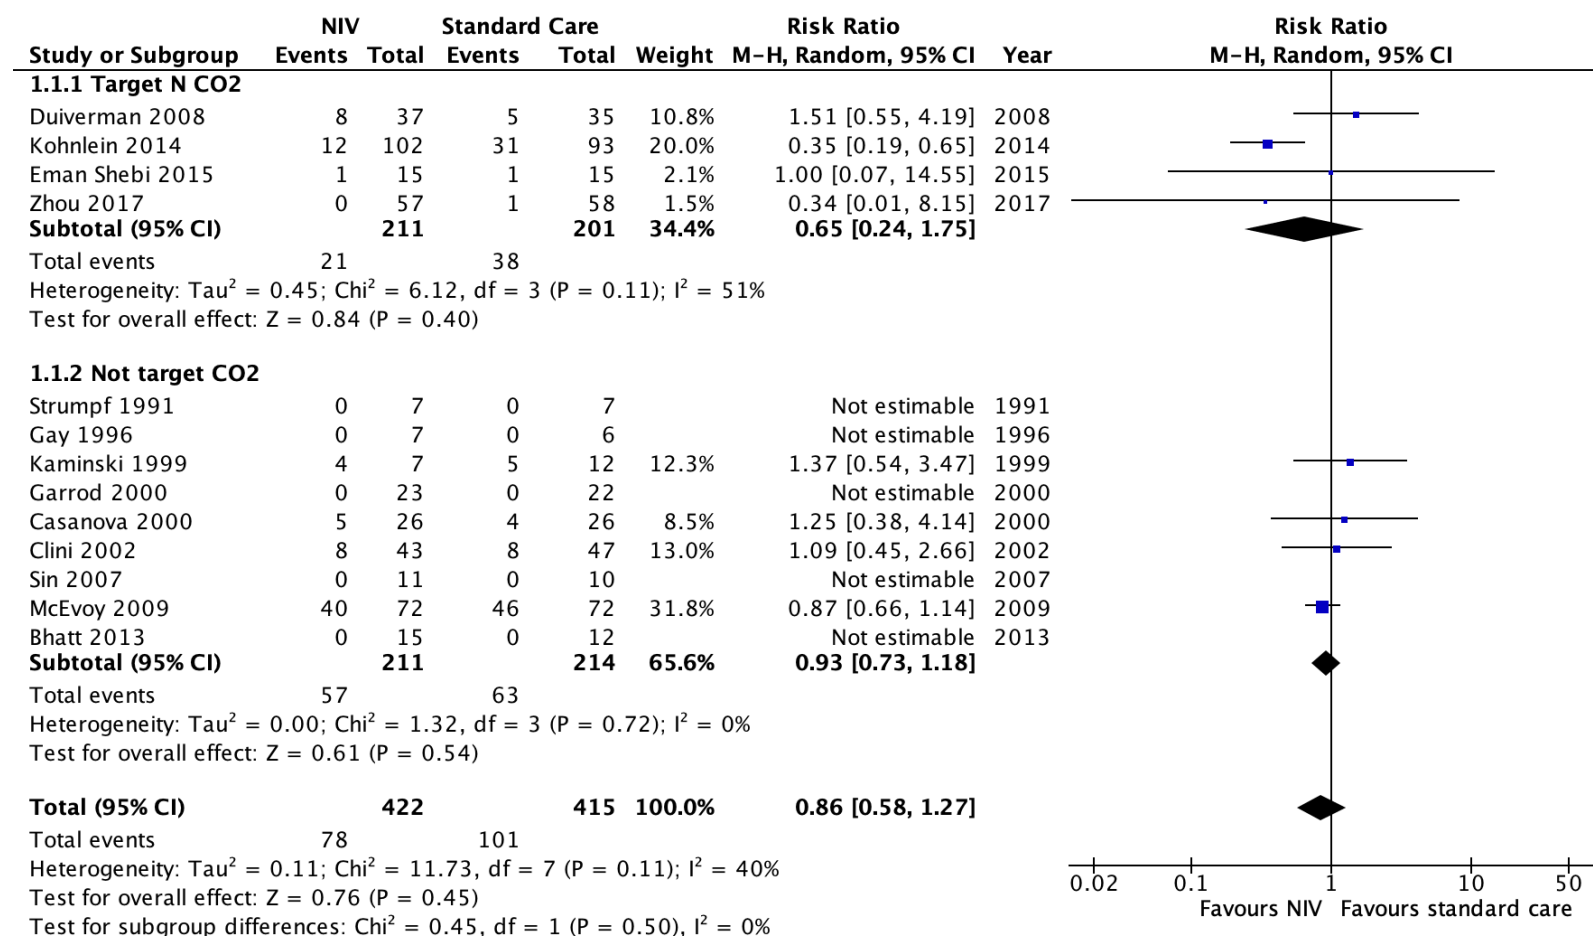



Forest plot 12: Quality of Life subgroup analysis - targeted PCO2 vs. non-targeted PCO2

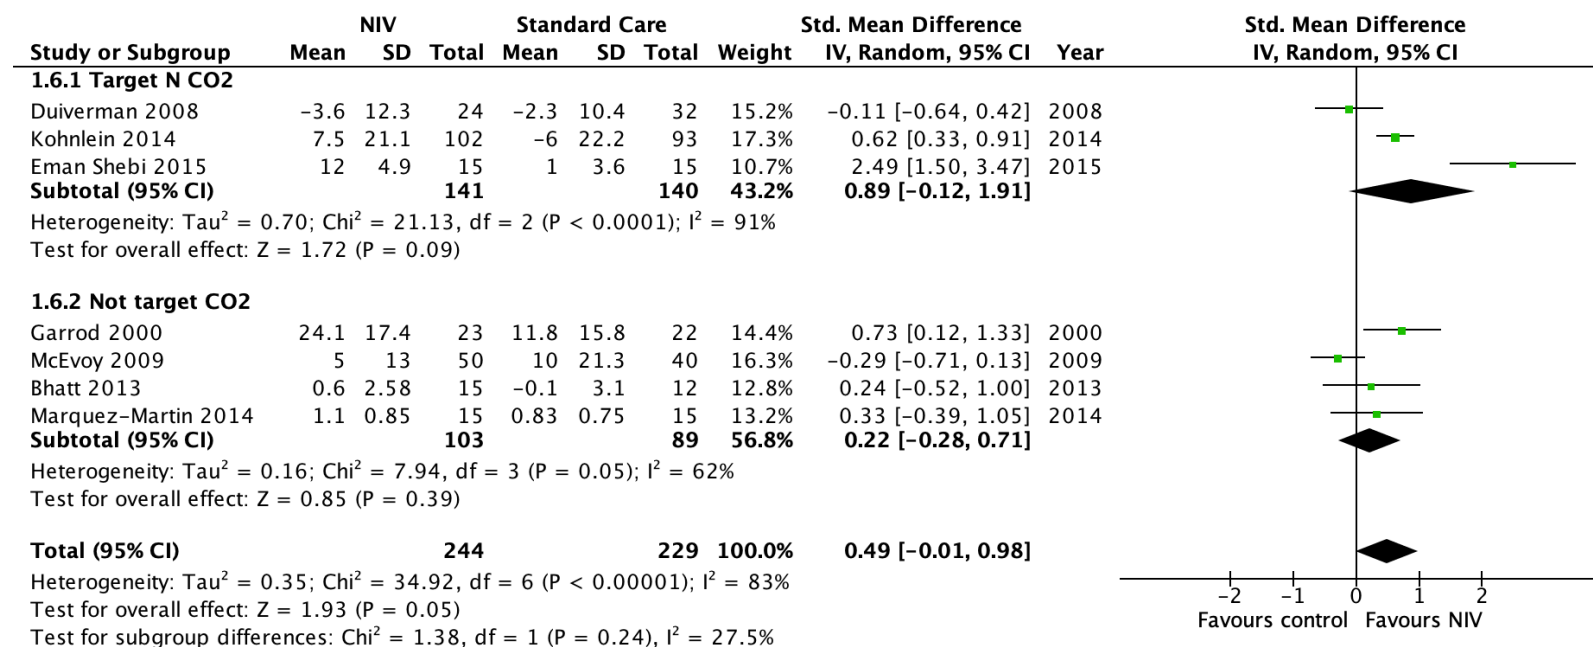

Forest plot 13: PCO2 subgroup analysis - targeted PCO2 vs. non-targeted PCO2

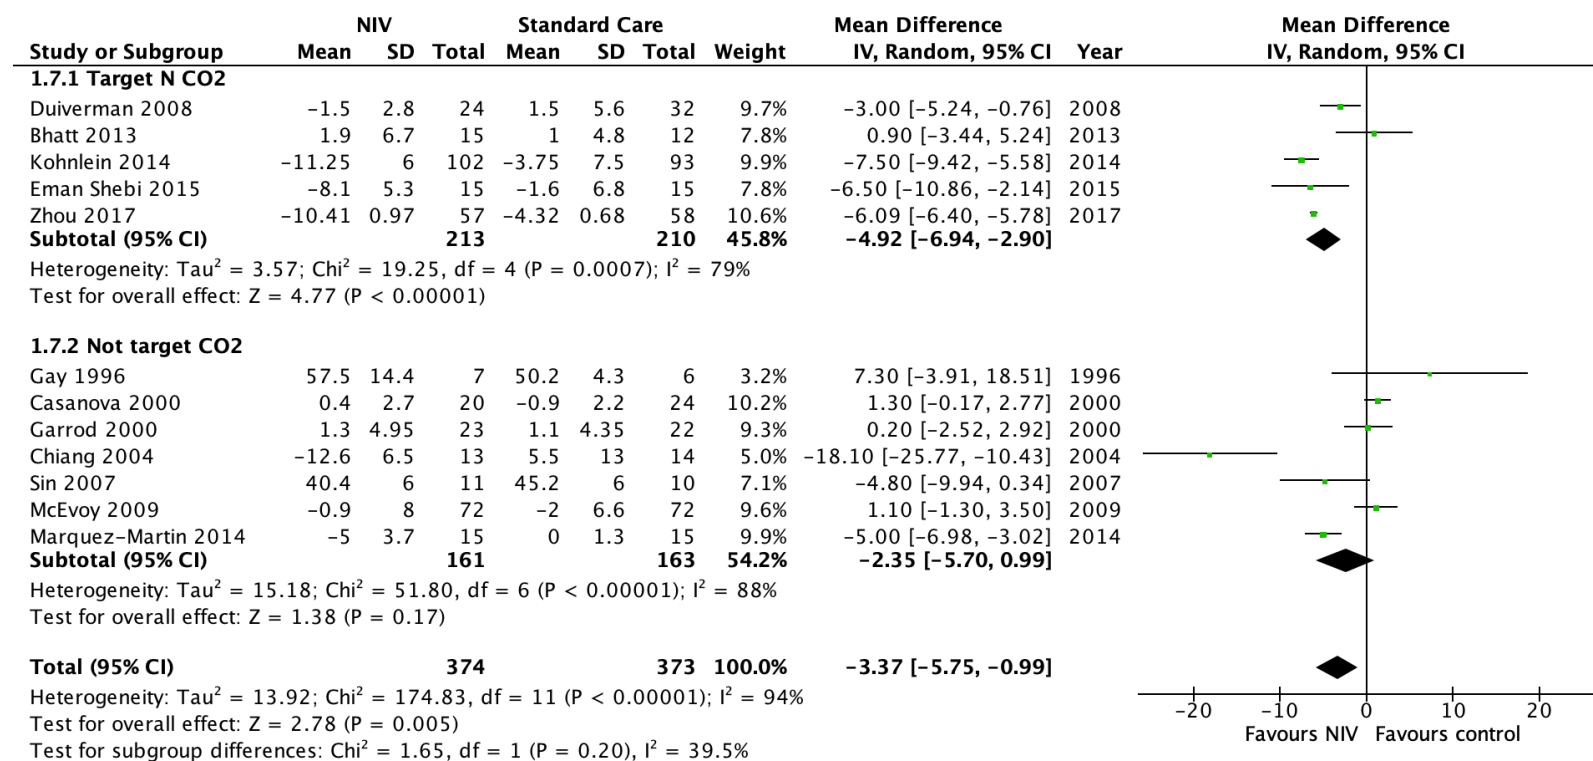

Forest plot 14: PO2 subgroup analysis - targeted PCO2 vs. non-targeted PCO2

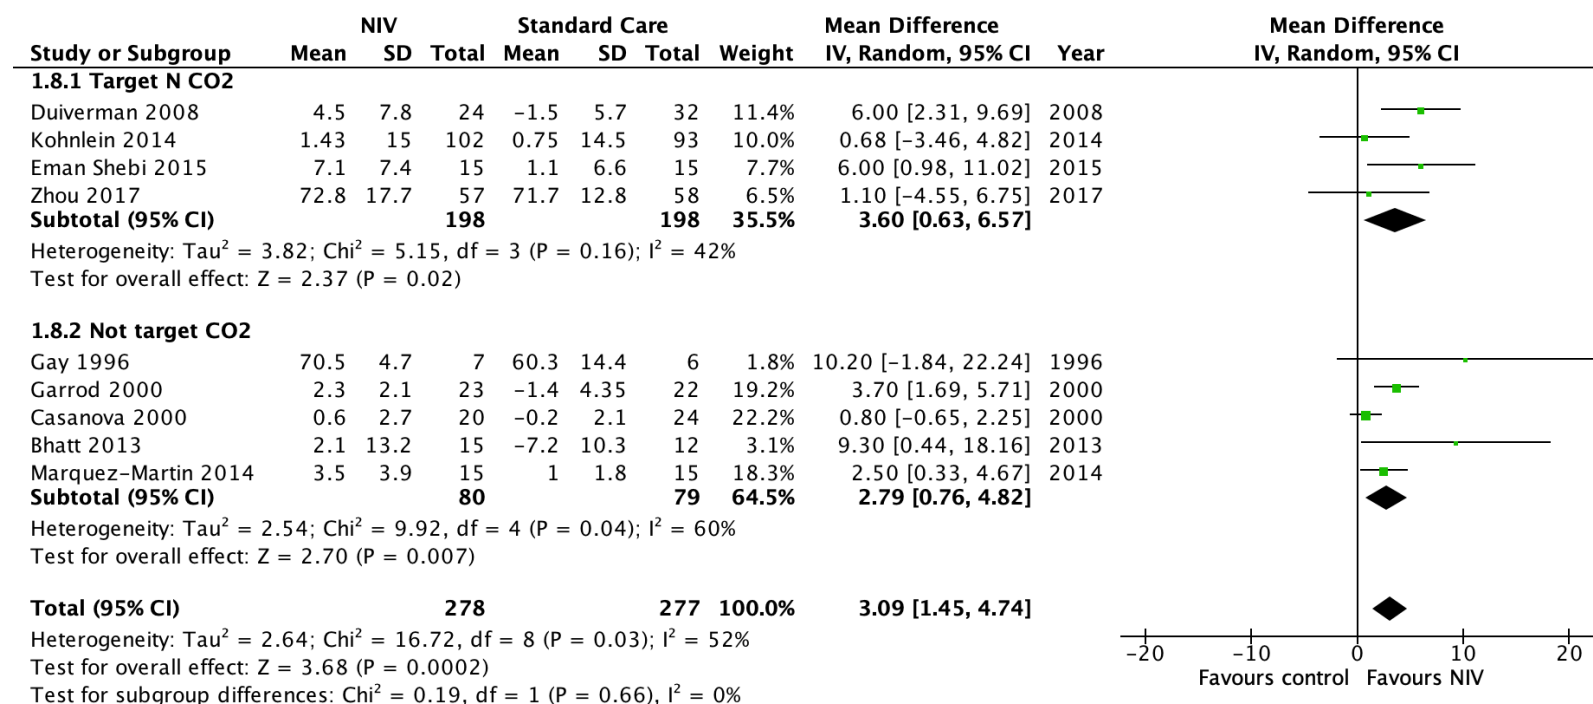

Forest plot 15: FEV1 subgroup analysis - targeted PCO2 vs. non-targeted PCO2

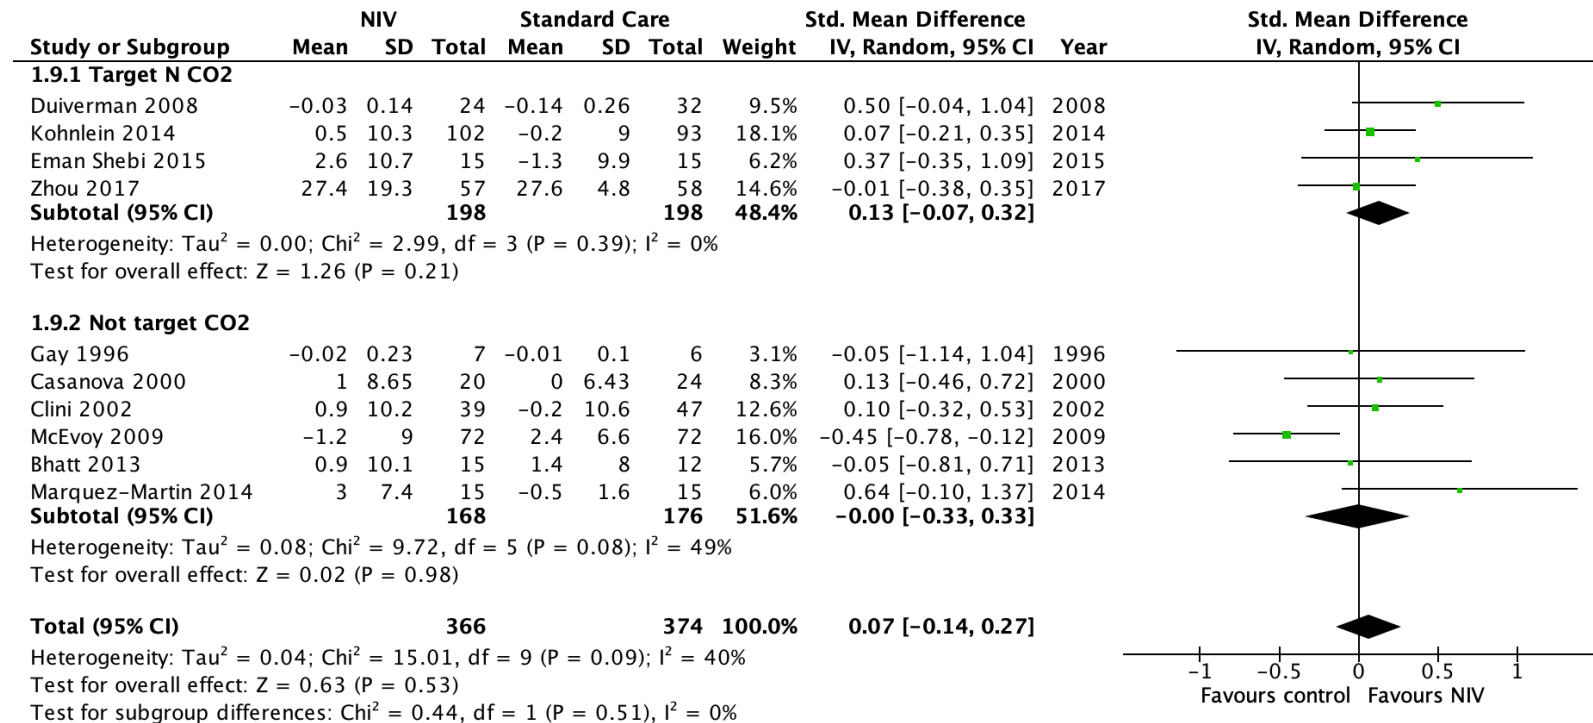

Forest plot 16: Six minute walk distance subgroup analysis - targeted PCO2 vs. non-targeted PCO2

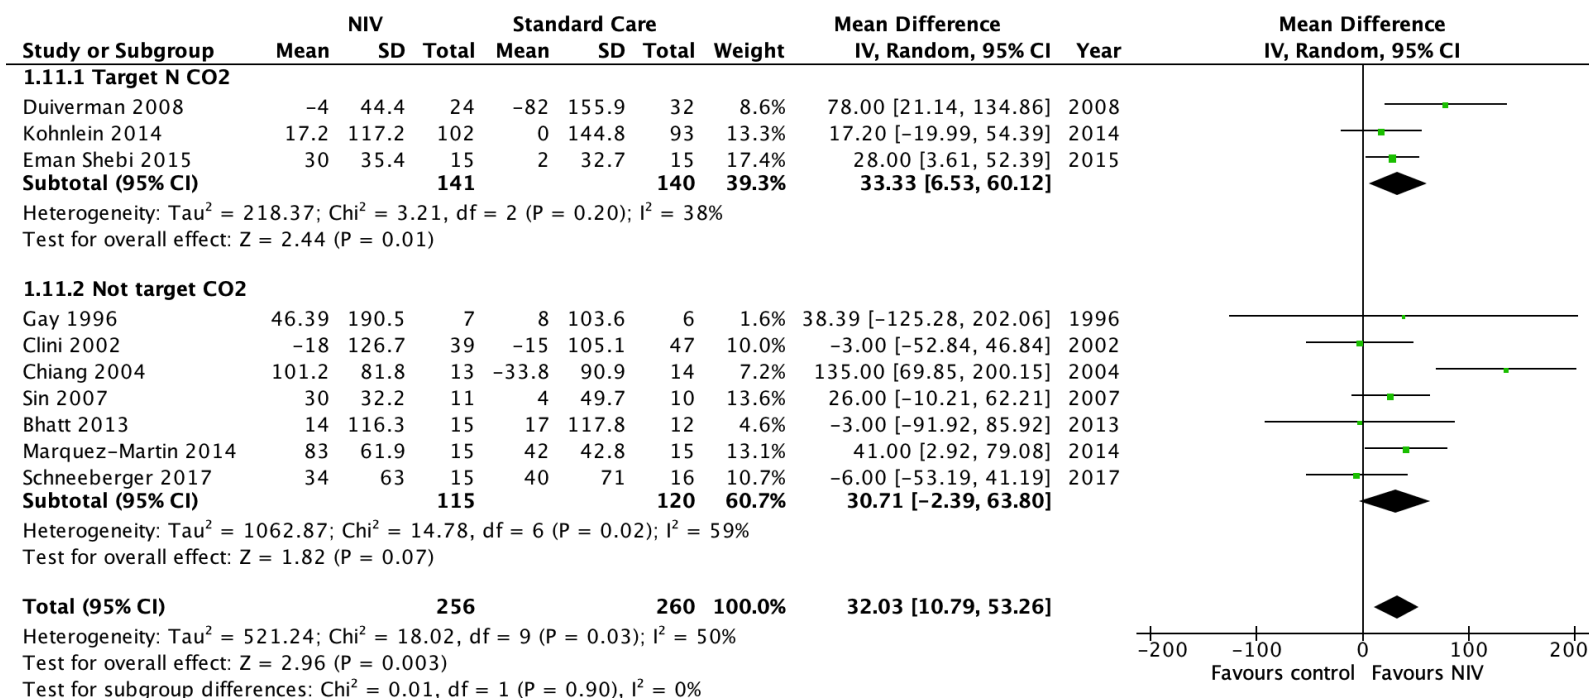

### GRADE Evidence Profile – Q2: NIV vs usual care after an exacerbation of COPD

| Certainty assessment                                                                                                 |              |                      |                          |              |                      |                           | № of patients     |                   | Effect                    |                                                     | Certainty        | Importance |
|----------------------------------------------------------------------------------------------------------------------|--------------|----------------------|--------------------------|--------------|----------------------|---------------------------|-------------------|-------------------|---------------------------|-----------------------------------------------------|------------------|------------|
| № of studies                                                                                                         | Study design | Risk of bias         | Inconsistency            | Indirectness | Imprecision          | Other consid-<br>erations | Long-term<br>NIV  | Usual<br>care     | Relative<br>(95% CI)      | Absolute<br>(95% CI)                                |                  |            |
| Mortality (follow up: range 1 years to 2 years)                                                                      |              |                      |                          |              |                      |                           |                   |                   |                           |                                                     |                  |            |
| 4                                                                                                                    | RCTs         | serious <sup>a</sup> | not serious              | not serious  | serious <sup>b</sup> | none                      | 55/201<br>(27.4%) | 62/205<br>(30.2%) | RR 0.92<br>(0.67 to 1.25) | 24 fewer per 1,000<br>(from 76 more to 100 fewer)   | ⊕⊕○○<br>LOW      | CRITICAL   |
| Exacerbations per year (follow up: range 1 years to 2 years)                                                         |              |                      |                          |              |                      |                           |                   |                   |                           |                                                     |                  |            |
| 3                                                                                                                    | RCTs         | serious <sup>c</sup> | not serious              | not serious  | serious <sup>b</sup> | none                      | 181               | 185               | -                         | SMD 0.19 SD lower<br>(0.40 lower to 0.01 higher)    | ⊕⊕○○<br>LOW      | CRITICAL   |
| Hospitalizations (follow up: range 1 years to 2 years)                                                               |              |                      |                          |              |                      |                           |                   |                   |                           |                                                     |                  |            |
| 3                                                                                                                    | RCTs         | serious <sup>a</sup> | serious <sup>d</sup>     | not serious  | serious <sup>b</sup> | none                      | 71/181<br>(39.2%) | 93/185<br>(50.3%) | RR 0.61<br>(0.30 to 1.24) | 196 fewer per 1,000<br>(from 121 more to 352 fewer) | ⊕○○○<br>VERY LOW | CRITICAL   |
| Dyspnea score (follow up: range 1 years to 2 years; assessed with: Medical Research Council Dyspnea (MRC) Score)     |              |                      |                          |              |                      |                           |                   |                   |                           |                                                     |                  |            |
| 2                                                                                                                    | RCTs         | serious <sup>c</sup> | not serious <sup>e</sup> | not serious  | serious <sup>b</sup> | none                      | 69                | 71                | -                         | MD 0.8 lower<br>(2.17 lower to 0.58 higher)         | ⊕⊕○○<br>LOW      | CRITICAL   |
| Quality of Life (follow up: range 1 years to 2 years; assessed with: Severe Respiratory Insufficiency Questionnaire) |              |                      |                          |              |                      |                           |                   |                   |                           |                                                     |                  |            |
| 2                                                                                                                    | RCTs         | serious <sup>c</sup> | not serious <sup>e</sup> | not serious  | serious <sup>b</sup> | none                      | 85                | 77                | -                         | MD 2.89 points higher<br>(6.8 higher to 1.03 lower) | ⊕⊕○○<br>LOW      | CRITICAL   |
| PaO2 (follow up: range 6 months to 2 years)                                                                          |              |                      |                          |              |                      |                           |                   |                   |                           |                                                     |                  |            |
| 4                                                                                                                    | RCTs         | serious <sup>c</sup> | serious <sup>d</sup>     | not serious  | serious <sup>b</sup> | none                      | 107               | 99                | -                         | MD 1.53 mmHg lower<br>(4.24 lower to 1.17 higher)   | ⊕○○○<br>VERY LOW | IMPORTANT  |
| PaCO2 (follow up: range 6 months to 2 years)                                                                         |              |                      |                          |              |                      |                           |                   |                   |                           |                                                     |                  |            |
| 5                                                                                                                    | RCTs         | serious <sup>c</sup> | not serious              | not serious  | not serious          | none                      | 134               | 126               | -                         | MD 3.41 mmHg lower<br>(4.09 lower to 2.73 lower)    | ⊕⊕⊕○<br>MODERATE | IMPORTANT  |
| Exercise tolerance (follow up: range 6 months to 2 years; assessed with: 6 minute walk test)                         |              |                      |                          |              |                      |                           |                   |                   |                           |                                                     |                  |            |

|                                             |      |                      |                           |             |                      |      |    |    |   |                                                         |                  |           |
|---------------------------------------------|------|----------------------|---------------------------|-------------|----------------------|------|----|----|---|---------------------------------------------------------|------------------|-----------|
| 2                                           | RCTs | serious <sup>c</sup> | very serious <sup>f</sup> | not serious | serious <sup>b</sup> | none | 30 | 25 | - | MD <b>8.64 m lower</b><br>(209 lower to 192 higher)     | ⊕○○○<br>VERY LOW | IMPORTANT |
| FEV1 (follow up: range 6 months to 1 years) |      |                      |                           |             |                      |      |    |    |   |                                                         |                  |           |
| 2                                           | RCTs | serious <sup>c</sup> | not serious               | not serious | serious <sup>b</sup> | none | 58 | 51 | - | SMD <b>0.36 SD lower</b><br>(0.74 lower to 0.03 higher) | ⊕⊕○○<br>LOW      | IMPORTANT |

CI: Confidence interval; RCT: Randomized controlled trial; RR: Risk ratio; MD: Mean difference; SMD: Standardised mean difference

### Explanations

- a. Lack of blinding of patients and clinicians which could result in cointervention.
- b. Wide 95% confidence intervals which do not exclude significant benefit nor significant harm.
- c. Lack of blinding of patients and clinicians in most studies which could result in cointervention and/or biased assessment of subjective outcomes, as well as significant loss to follow-up for end-of-study measurements.
- d. I-squared (I<sup>2</sup>) values high, with individual studies on different sides of the line of no effect.
- e. Though high I-squared (I<sup>2</sup>) values, all point estimates are on the side of benefit.
- f. Very high I-squared (I<sup>2</sup>) values with studies on each side of the line of no effect.

Forest plot 1: Mortality

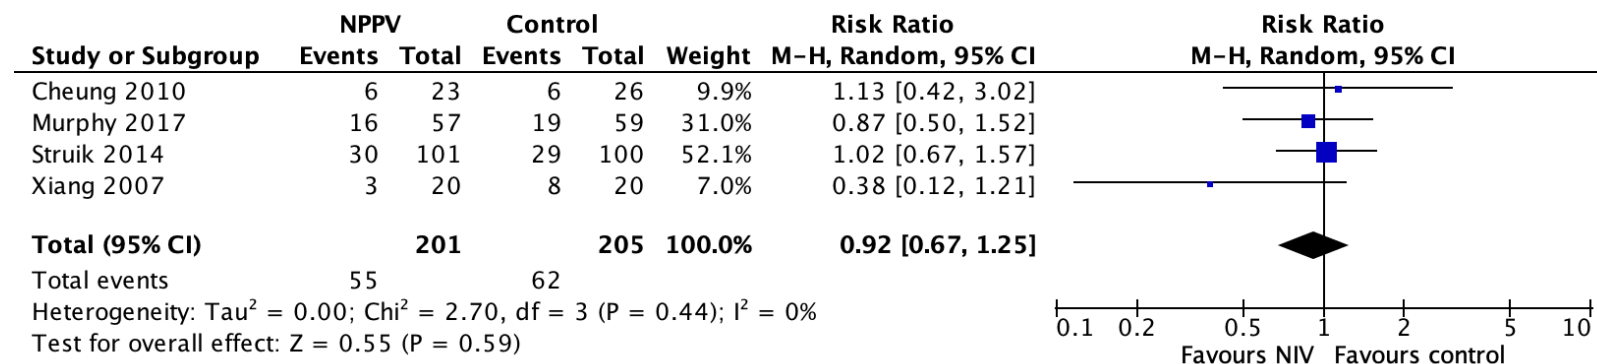

Forest plot 2: Exacerbations

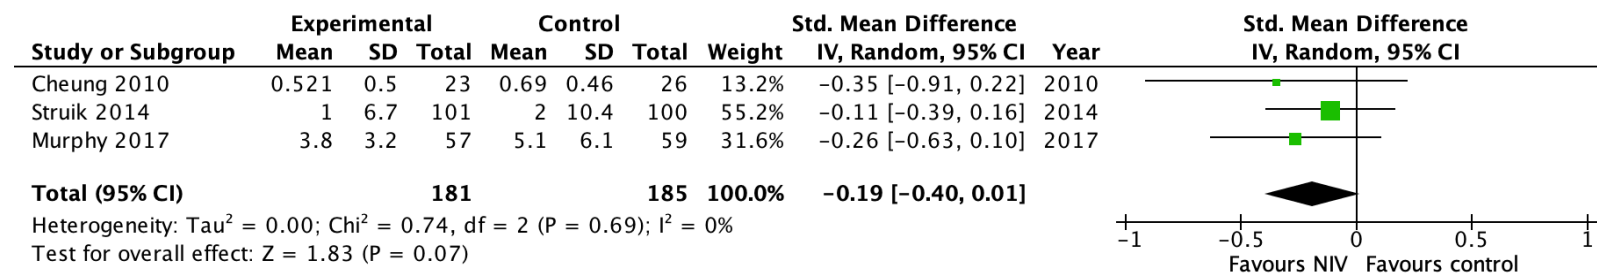

Forest plot 3: Hospitalizations

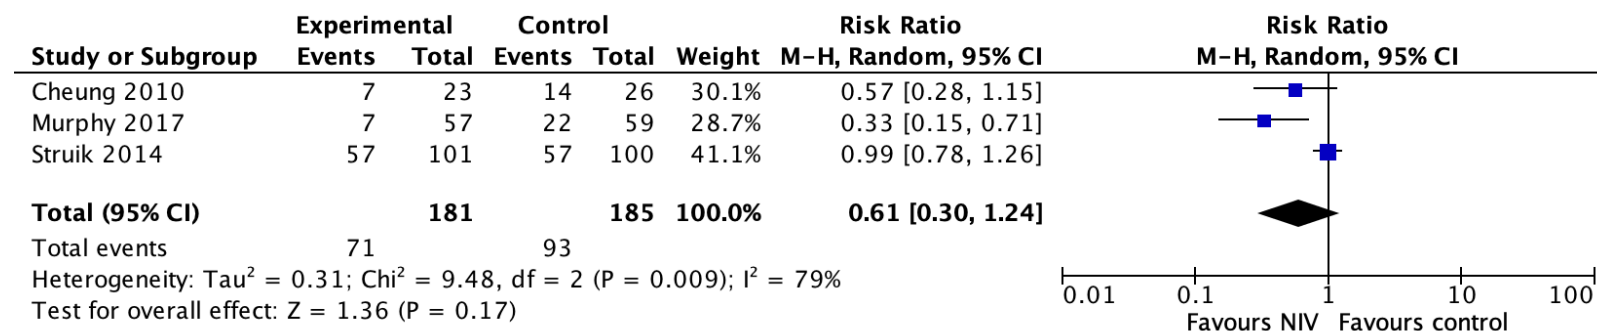



#### Forest plot 4: Dyspnea

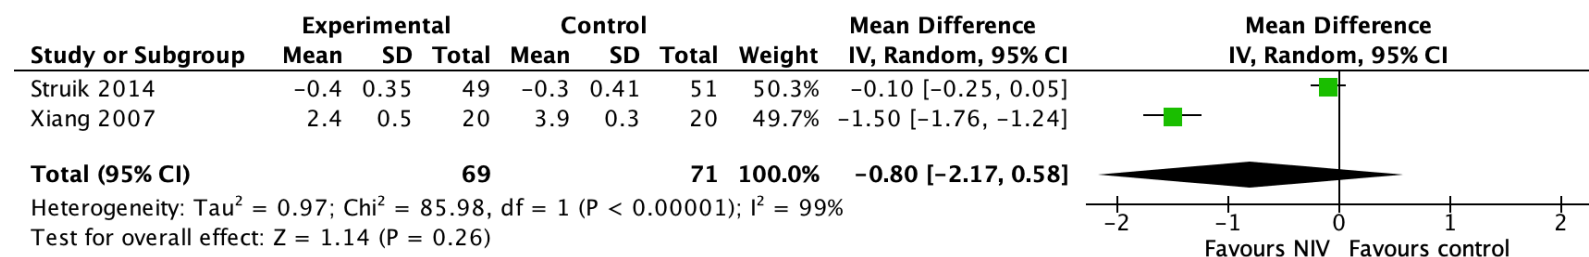

#### Forest plot 6: Quality of life

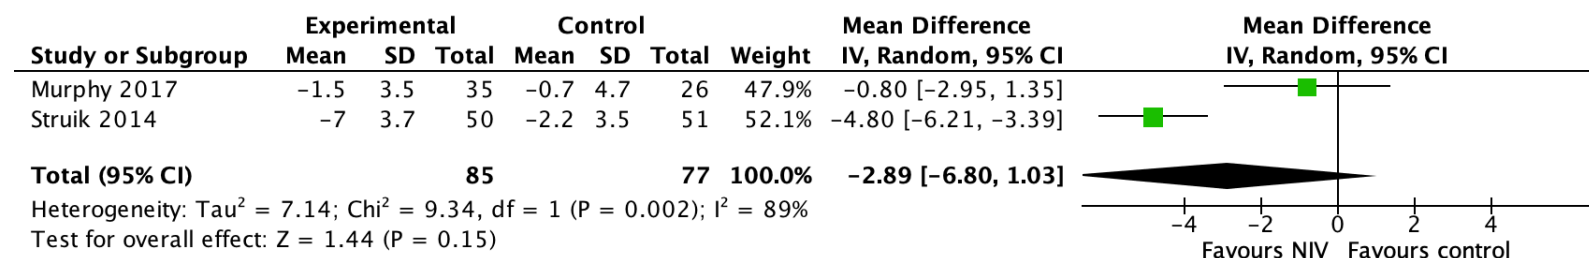

#### Forest plot 6: PCO2

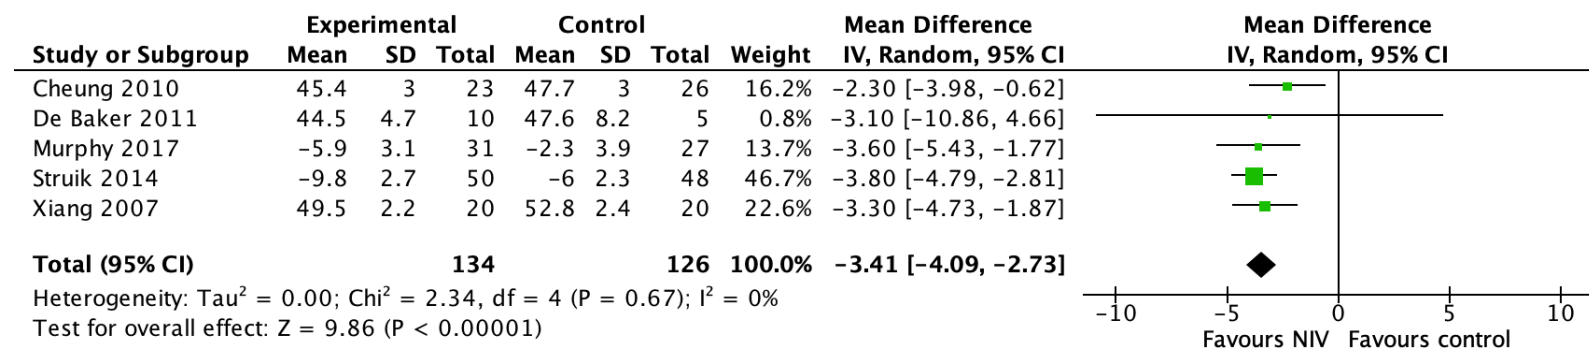

Forest plot 7: PO2

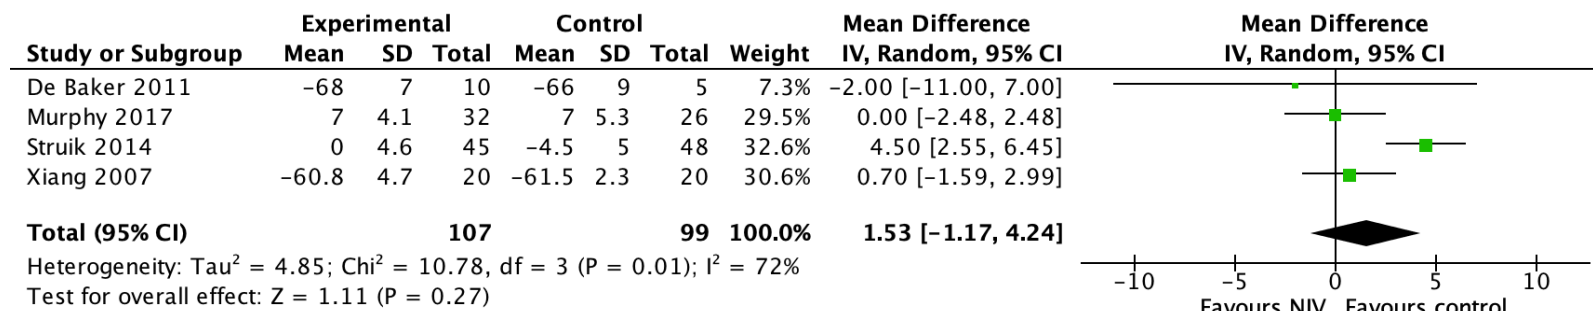

Forest plot 8: Exercise tolerance

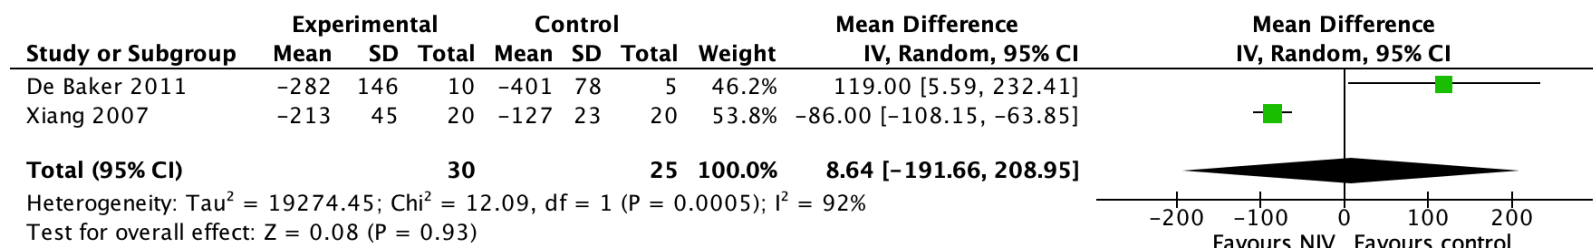

Forest plot 9: Pulmonary function- FEV1

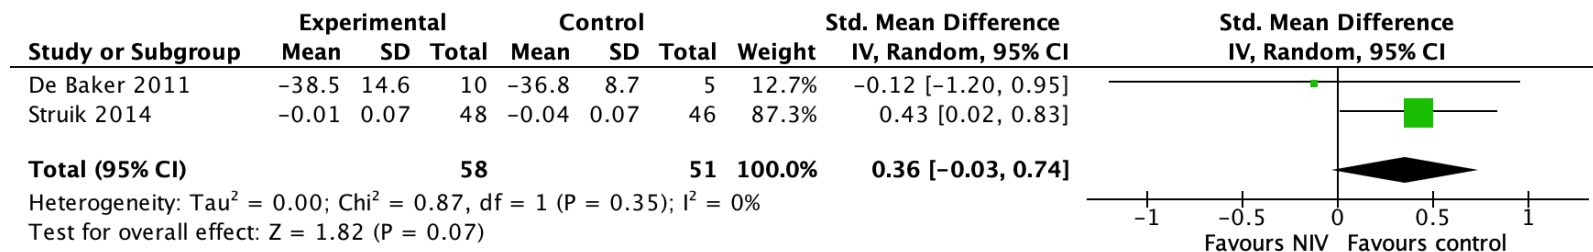

## GRADE Evidence Profile – Q3: NIV with targeted normalization of PaCO2 levels compared to NIV without targeting normal PaCO2 level for long-term NIV in COPD patients

| Certainty assessment                                                                      |                   |                      |               |              |                             |                      | № of patients                                   |                                          | Effect            |                                                              | Certainty        | Importance |
|-------------------------------------------------------------------------------------------|-------------------|----------------------|---------------|--------------|-----------------------------|----------------------|-------------------------------------------------|------------------------------------------|-------------------|--------------------------------------------------------------|------------------|------------|
| № of studies                                                                              | Study design      | Risk of bias         | Inconsistency | Indirectness | Imprecision                 | Other considerations | NIV with targeted normalization of PaCO2 levels | NIV without targeting normal PaCO2 level | Relative (95% CI) | Absolute (95% CI)                                            |                  |            |
| Quality of Life (follow up: mean 6 weeks; assessed with: SRI-SS score (higher is better)) |                   |                      |               |              |                             |                      |                                                 |                                          |                   |                                                              |                  |            |
| 3                                                                                         | randomised trials | serious <sup>a</sup> | not serious   | not serious  | serious <sup>b,c</sup>      | none                 | 34                                              | 36                                       | -                 | MD <b>0.95 points lower</b><br>(8.33 lower to 6.42 higher)   | ⊕⊕○○<br>LOW      | CRITICAL   |
| Dyspnea (follow up: mean 6 weeks; assessed with: Borg score)                              |                   |                      |               |              |                             |                      |                                                 |                                          |                   |                                                              |                  |            |
| 1                                                                                         | randomised trials | serious <sup>a</sup> | not serious   | not serious  | serious <sup>c</sup>        | none                 | 15                                              | 15                                       | -                 | MD <b>1.54 points higher</b><br>(0.56 higher to 2.52 higher) | ⊕⊕○○<br>LOW      | CRITICAL   |
| FEV1 (follow up: mean 6 weeks; assessed with: L)                                          |                   |                      |               |              |                             |                      |                                                 |                                          |                   |                                                              |                  |            |
| 1                                                                                         | randomised trials | serious <sup>a</sup> | not serious   | not serious  | serious <sup>b,c</sup>      | none                 | 11                                              | 14                                       | -                 | MD <b>0.04 L higher</b><br>(0.34 lower to 0.42 higher)       | ⊕⊕○○<br>LOW      | IMPORTANT  |
| PaCO2 (follow up: mean 6 weeks; assessed with: mmHg)                                      |                   |                      |               |              |                             |                      |                                                 |                                          |                   |                                                              |                  |            |
| 5                                                                                         | randomised trials | serious <sup>a</sup> | not serious   | not serious  | serious <sup>c</sup>        | none                 | 65                                              | 68                                       | -                 | MD <b>4.93 mmHg lower</b><br>(7.43 lower to 2.42 lower)      | ⊕⊕○○<br>LOW      | IMPORTANT  |
| PaO2 (follow up: mean 6 weeks; assessed with: mmHg)                                       |                   |                      |               |              |                             |                      |                                                 |                                          |                   |                                                              |                  |            |
| 3                                                                                         | randomised trials | serious <sup>a</sup> | not serious   | not serious  | serious <sup>b,c</sup>      | none                 | 39                                              | 39                                       | -                 | MD <b>3.4 mmHg higher</b><br>(2.39 lower to 9.19 higher)     | ⊕⊕○○<br>LOW      | IMPORTANT  |
| 6MWD (follow up: mean 6 weeks; assessed with: metres)                                     |                   |                      |               |              |                             |                      |                                                 |                                          |                   |                                                              |                  |            |
| 1                                                                                         | randomised trials | serious <sup>a</sup> | not serious   | not serious  | serious <sup>b,c</sup>      | none                 | 15                                              | 15                                       | -                 | MD <b>14 metres higher</b><br>(70.42 lower to 98.42 higher)  | ⊕⊕○○<br>LOW      | IMPORTANT  |
| Sleep Comfort (follow up: mean 6 weeks; assessed with: VAS scale)                         |                   |                      |               |              |                             |                      |                                                 |                                          |                   |                                                              |                  |            |
| 1                                                                                         | randomised trials | serious <sup>a</sup> | not serious   | not serious  | very serious <sup>b,c</sup> | none                 | 8                                               | 7                                        | -                 | MD <b>1 cm higher</b><br>(28.42 lower to 30.42 higher)       | ⊕○○○<br>VERY LOW | IMPORTANT  |

CI: Confidence interval; MD: Mean difference

### Explanations

- a. Unblinded intervention may affect co-intervention use. Crossover study with potential for carryover effect.
- b. Wide confidence intervals don't exclude significant harm or significant benefit.
- c. Small number of patients limit precision.

## Forest plot 1: Quality of Life

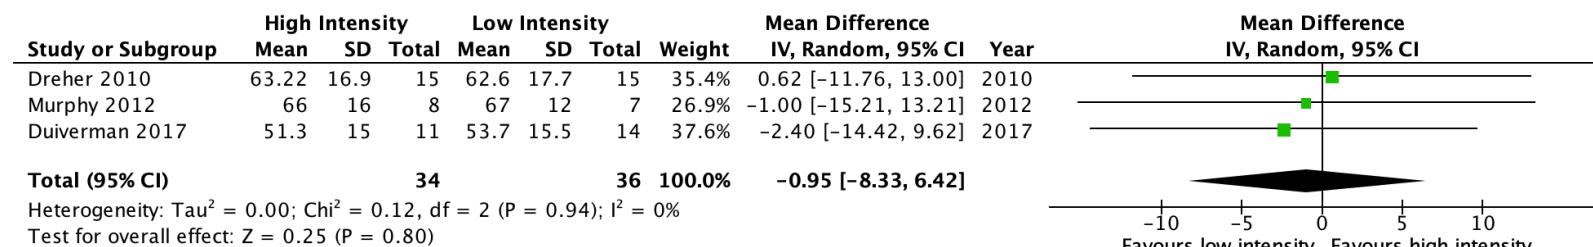

## Forest plot 2: PCO2

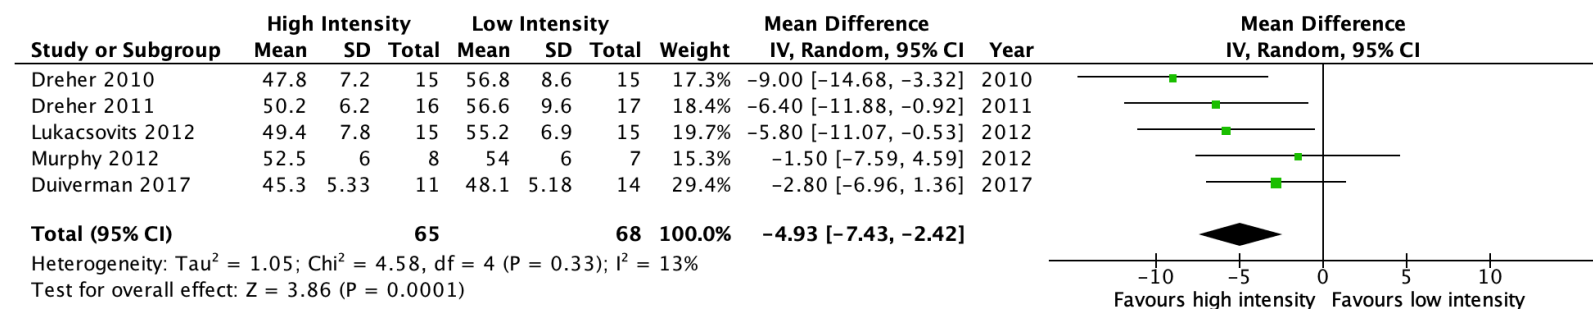

## Forest plot 3: PO2

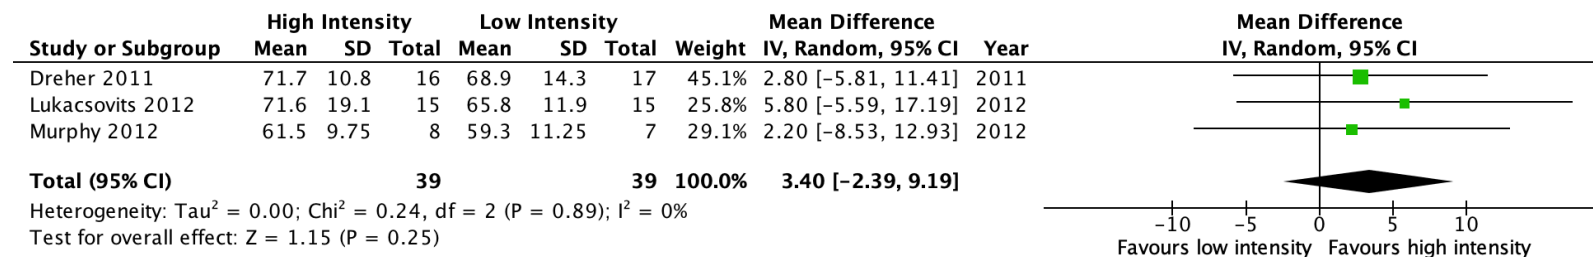

**Question 4:** Adaptive ventilatory modes in long-term NIV for COPD

| Certainty assessment                                                                                                                                                                 |              |                      |               |                      |                      |                           | № of patients |                  | Effect            |                                                         | Certainty        | Importance |
|--------------------------------------------------------------------------------------------------------------------------------------------------------------------------------------|--------------|----------------------|---------------|----------------------|----------------------|---------------------------|---------------|------------------|-------------------|---------------------------------------------------------|------------------|------------|
| № of studies                                                                                                                                                                         | Study design | Risk of bias         | Inconsistency | Indirectness         | Imprecision          | Other consid-<br>erations | Adaptive NIV  | Conventional NIV | Relative (95% CI) | Absolute (95% CI)                                       |                  |            |
| Quality of Life (follow up: range 2 months to 3 months; assessed with: Severe Respiratory Insufficiency Questionnaire (1 study); St. George's Respiratory Questionnaire (2 studies)) |              |                      |               |                      |                      |                           |               |                  |                   |                                                         |                  |            |
| 3                                                                                                                                                                                    | RCTs         | serious <sup>a</sup> | not serious   | not serious          | serious <sup>b</sup> | none                      | 54            | 54               | -                 | SMD <b>0.28 SD higher</b><br>(0.66 higher to 0.1 lower) | ⊕⊕○○<br>LOW      | CRITICAL   |
| Sleep quality (follow up: range 1 days to 3 months; assessed with: Visual analogue scale (2 studies); unvalidated questionnaire (2 studies); Epworth Sleepiness Scale (1 study))     |              |                      |               |                      |                      |                           |               |                  |                   |                                                         |                  |            |
| 5                                                                                                                                                                                    | RCTs         | serious <sup>a</sup> | not serious   | serious <sup>c</sup> | serious <sup>b</sup> | none                      | 80            | 80               | -                 | SMD <b>0.14 lower</b><br>(0.53 lower to 0.26 higher)    | ⊕○○○<br>VERY LOW | IMPORTANT  |
| Exercise tolerance (follow up: range 2 months to 3 months; assessed with: Shuttle walk test (2 studies); 6 minute walk test (1 study))                                               |              |                      |               |                      |                      |                           |               |                  |                   |                                                         |                  |            |
| 3                                                                                                                                                                                    | RCTs         | serious <sup>a</sup> | not serious   | not serious          | serious <sup>b</sup> | none                      | 47            | 47               | -                 | SMD <b>0.1 lower</b><br>(0.51 lower to 0.3 higher)      | ⊕⊕○○<br>LOW      | IMPORTANT  |
| PaCO2 (follow up: range 1 days to 3 months)                                                                                                                                          |              |                      |               |                      |                      |                           |               |                  |                   |                                                         |                  |            |
| 6                                                                                                                                                                                    | RCTs         | serious <sup>a</sup> | not serious   | not serious          | serious <sup>b</sup> | none                      | 91            | 91               | -                 | MD <b>1.95 mmHg lower</b><br>(4.29 lower to 0.4 higher) | ⊕⊕○○<br>LOW      | IMPORTANT  |
| Oxygenation (follow up: range 1 days to 3 months; assessed with: PaO2, or SaO2 oximetry)                                                                                             |              |                      |               |                      |                      |                           |               |                  |                   |                                                         |                  |            |
| 6                                                                                                                                                                                    | RCTs         | serious <sup>a</sup> | not serious   | not serious          | serious <sup>b</sup> | none                      | 91            | 91               | -                 | SMD <b>0.04 lower</b><br>(0.33 lower to 0.26 higher)    | ⊕⊕○○<br>LOW      | IMPORTANT  |

CI: Confidence interval; SMD: Standardised mean difference; MD: Mean difference

**Explanations**

- a. Lack of blinding which could result in cointervention, or affect judgement of subjective outcomes.
- b. Wide 95% confidence interval which fails to exclude significant benefit or harm.
- c. Most studies did not use a validated instrument to assess sleep quality.

Forest plot 1: Quality of Life

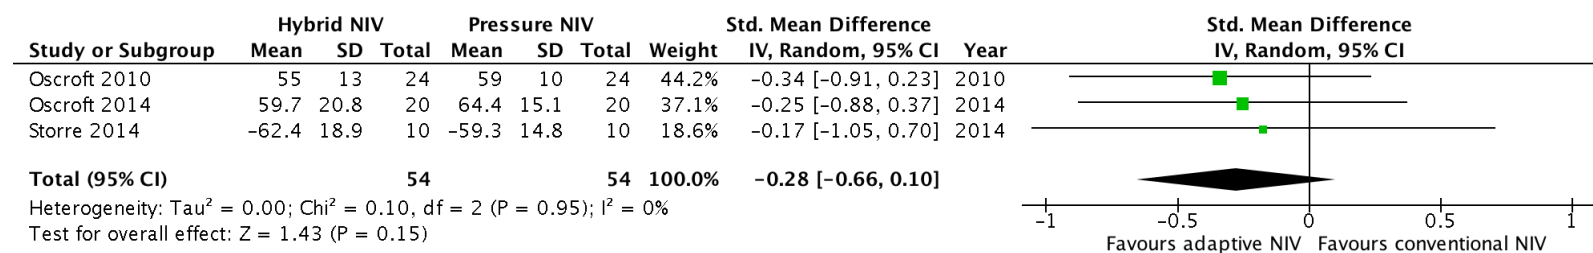

Forest plot 2: Sleep quality

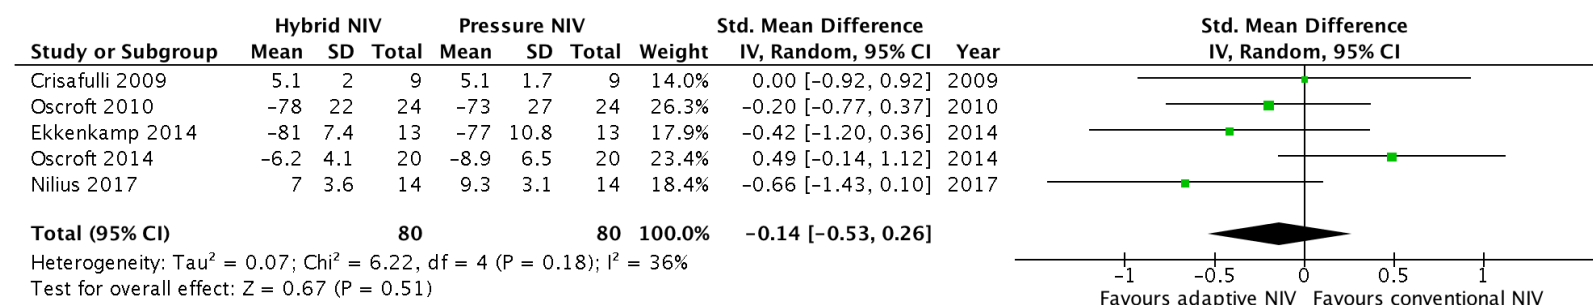

Forest plot 3: Exercise tolerance

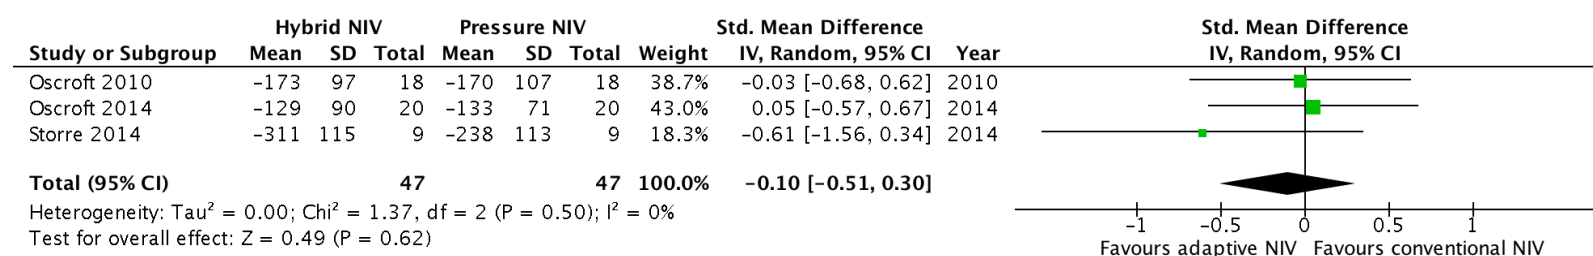

Forest plot 4: PCO2

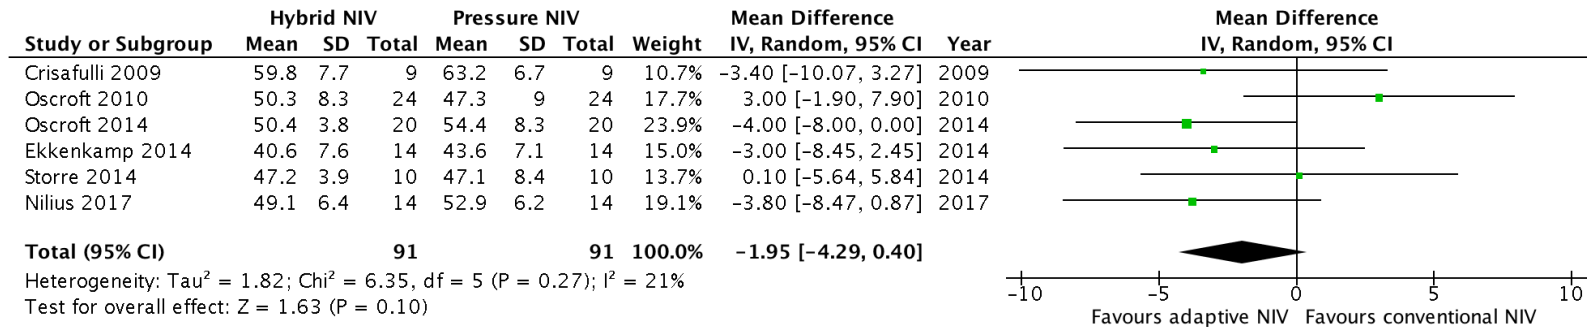

Forest plot 5: PO2

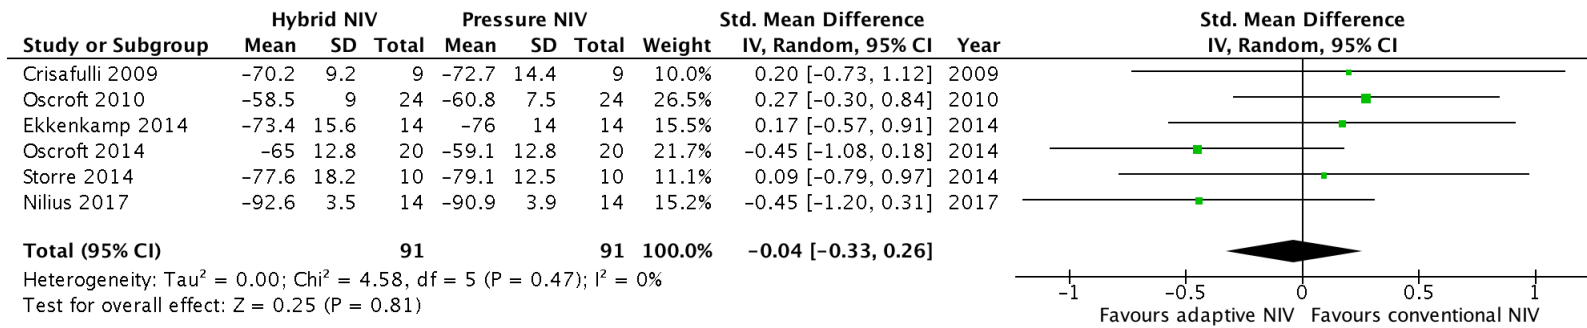

## QUESTION

### Should Long-term NIV vs. usual care be used for stable patients with COPD?

|                        |                                                                                                                                                                                                                                                                                                 |
|------------------------|-------------------------------------------------------------------------------------------------------------------------------------------------------------------------------------------------------------------------------------------------------------------------------------------------|
| POPULATION:            | stable patients with COPD                                                                                                                                                                                                                                                                       |
| INTERVENTION:          | Long-term NIV                                                                                                                                                                                                                                                                                   |
| COMPARISON:            | usual care                                                                                                                                                                                                                                                                                      |
| MAIN OUTCOMES:         | Mortality; Number of Hospitalizations; Quality of Life (higher is better); Change in Dyspnea Score ; Change in PaCO <sub>2</sub> ; Change in PaO <sub>2</sub> ; Change in FEV <sub>1</sub> ; Change in FVC; Change in 6 minute walk distance; Change in Sleep Efficiency; Minor Adverse Events; |
| SETTING:               |                                                                                                                                                                                                                                                                                                 |
| PERSPECTIVE:           |                                                                                                                                                                                                                                                                                                 |
| BACKGROUND:            |                                                                                                                                                                                                                                                                                                 |
| CONFLICT OF INTERESTS: |                                                                                                                                                                                                                                                                                                 |

## ASSESSMENT

### Problem

Is the problem a priority?

| JUDGEMENT                                                                                                                                                                                                       | RESEARCH EVIDENCE | ADDITIONAL CONSIDERATIONS                                                                                                            |
|-----------------------------------------------------------------------------------------------------------------------------------------------------------------------------------------------------------------|-------------------|--------------------------------------------------------------------------------------------------------------------------------------|
| <input type="radio"/> No<br><input type="radio"/> Probably no<br><input type="radio"/> Probably yes<br><input checked="" type="radio"/> Yes<br><input type="radio"/> Varies<br><input type="radio"/> Don't know |                   | The panel decided on these PICO questions in advance of the guideline meeting on the basis of their importance to clinical practice. |

### Desirable Effects

How substantial are the desirable anticipated effects?

| JUDGEMENT                                                                                                                                                                                                    | RESEARCH EVIDENCE                                                                                                                                                                                                                                                                                     | ADDITIONAL CONSIDERATIONS                                                                                                                                                                                                                                                                                                                      |
|--------------------------------------------------------------------------------------------------------------------------------------------------------------------------------------------------------------|-------------------------------------------------------------------------------------------------------------------------------------------------------------------------------------------------------------------------------------------------------------------------------------------------------|------------------------------------------------------------------------------------------------------------------------------------------------------------------------------------------------------------------------------------------------------------------------------------------------------------------------------------------------|
| <input type="radio"/> Trivial<br><input type="radio"/> Small<br><input type="radio"/> Moderate<br><input checked="" type="radio"/> Large<br><input type="radio"/> Varies<br><input type="radio"/> Don't know | <b>Desirable</b><br>Quality of life increased (0.49 SD higher)<br>Reduced dyspnea score (0.51 SD lower). Really key-- this is a critical outcome for patients.<br>Small improvement in 6 minute walk test (~30 m longer)<br><br><b>Undesirable</b><br>Slightly lower sleep efficiency (0.55 SD lower) | Significant concerns raised about the heterogeneity of ventilatory settings-- do studies with higher CO <sub>2</sub> clearance or settings demonstrate a greater effect?<br><br>Further analysis requested on settings and whether or not there are other effects. Sensitivity analysis done looking at high-vs-low CO <sub>2</sub> targeting. |



|  |                                                                                                                                                                                                                                                                                                                                                                                                     |                                                                      |
|--|-----------------------------------------------------------------------------------------------------------------------------------------------------------------------------------------------------------------------------------------------------------------------------------------------------------------------------------------------------------------------------------------------------|----------------------------------------------------------------------|
|  | <p>Increase in minor adverse events eg skin breakdown etc. (10 fold increase)</p> <p><b>Neutral/little effect</b><br/> Reduced mortality with NIV (14%) -not explicitly respiratory causes; and potentially high rate of dropouts, but imprecise with wide 95% CI.<br/> Reduced hospitalizations (mean 1.26 fewer), but imprecise with wide 95% CI<br/> No significant effect upon FEV1 or FVC.</p> | Studies targeting normal CO2 had stronger signal for benefit of NIV. |
|--|-----------------------------------------------------------------------------------------------------------------------------------------------------------------------------------------------------------------------------------------------------------------------------------------------------------------------------------------------------------------------------------------------------|----------------------------------------------------------------------|

## Undesirable Effects

How substantial are the undesirable anticipated effects?

| JUDGEMENT                                                                                                                                                                                                    | RESEARCH EVIDENCE                                                                                                                                                                                                                                                                                                                                                                                                                                                                                                                                                                                                                                                                                                      | ADDITIONAL CONSIDERATIONS                                                                                                                                                                                                                       |
|--------------------------------------------------------------------------------------------------------------------------------------------------------------------------------------------------------------|------------------------------------------------------------------------------------------------------------------------------------------------------------------------------------------------------------------------------------------------------------------------------------------------------------------------------------------------------------------------------------------------------------------------------------------------------------------------------------------------------------------------------------------------------------------------------------------------------------------------------------------------------------------------------------------------------------------------|-------------------------------------------------------------------------------------------------------------------------------------------------------------------------------------------------------------------------------------------------|
| <input type="radio"/> Large<br><input type="radio"/> Moderate<br><input checked="" type="radio"/> Small<br><input type="radio"/> Trivial<br><input type="radio"/> Varies<br><input type="radio"/> Don't know | <p><b>Desirable</b><br/> Quality of life increased (0.49 SD higher)<br/> Reduced dyspnea score (0.51 SD lower). Really key-- this is a critical outcome for patients.<br/> Small improvement in 6 minute walk test (~30 m longer)</p> <p><b>Undesirable</b><br/> Slightly lower sleep efficiency (0.55 SD lower)<br/> Increase in minor adverse events eg skin breakdown etc. (10 fold increase)</p> <p><b>Neutral/little effect</b><br/> Reduced mortality with NIV (14%) -not explicitly respiratory causes; and potentially high rate of dropouts, but imprecise with wide 95% CI.<br/> Reduced hospitalizations (mean 1.26 fewer), but imprecise with wide 95% CI<br/> No significant effect upon FEV1 or FVC.</p> | Dropout is also a concern here. Those that did not tolerate NIV fell out and therefore not exposed to benefit. (getting at lack of adherence as well)<br>Meecham-Jones study data missing for sleep quality, though unlikely to change effects. |

## Certainty of evidence

What is the overall certainty of the evidence of effects?

| JUDGEMENT                                                                                                                                                                           | RESEARCH EVIDENCE                                                                                                                   | ADDITIONAL CONSIDERATIONS |
|-------------------------------------------------------------------------------------------------------------------------------------------------------------------------------------|-------------------------------------------------------------------------------------------------------------------------------------|---------------------------|
| <input type="radio"/> Very low<br><input checked="" type="radio"/> Low<br><input type="radio"/> Moderate<br><input type="radio"/> High<br><input type="radio"/> No included studies | <p>Moderate certainty for dyspnea scores, changes in PaO2, PCO2.<br/> Low or very low certainty evidence for all other outcomes</p> |                           |

## Values

Is there important uncertainty about or variability in how much people value the main outcomes?

| JUDGEMENT                                                                                                                                                                                                                                                                               | RESEARCH EVIDENCE                                                                                                                                                                                    | ADDITIONAL CONSIDERATIONS |
|-----------------------------------------------------------------------------------------------------------------------------------------------------------------------------------------------------------------------------------------------------------------------------------------|------------------------------------------------------------------------------------------------------------------------------------------------------------------------------------------------------|---------------------------|
| <input type="radio"/> Important uncertainty or variability<br><input checked="" type="radio"/> Possibly important uncertainty or variability<br><input type="radio"/> Probably no important uncertainty or variability<br><input type="radio"/> No important uncertainty or variability | Exacerbations, dyspnea, and quality of life are among the most important outcomes in patients with COPD. Symptom relief was generally found to be more important than adverse events. PMID: 30002103 |                           |

## Balance of effects

Does the balance between desirable and undesirable effects favor the intervention or the comparison?

| JUDGEMENT                                                                                                                                                                                                                                                                                                                                                                       | RESEARCH EVIDENCE | ADDITIONAL CONSIDERATIONS                                                                                                                                                                                                                                  |
|---------------------------------------------------------------------------------------------------------------------------------------------------------------------------------------------------------------------------------------------------------------------------------------------------------------------------------------------------------------------------------|-------------------|------------------------------------------------------------------------------------------------------------------------------------------------------------------------------------------------------------------------------------------------------------|
| <input type="radio"/> Favors the comparison<br><input type="radio"/> Probably favors the comparison<br><input type="radio"/> Does not favor either the intervention or the comparison<br><input checked="" type="radio"/> Probably favors the intervention<br><input type="radio"/> Favors the intervention<br><input type="radio"/> Varies<br><input type="radio"/> Don't know |                   | The onyl negative effects see were sleep efficiency and minor adverse events; most other outcomes were positive (QOL, dyspnea, exercise tolerance) or neutral. Of note, mortality and hospitalizations the signal is towards benefit, which is reassuring. |

## Resources required

How large are the resource requirements (costs)?

| JUDGEMENT                                                                                                                                                                                                                                                                                       | RESEARCH EVIDENCE                                                                                                                                                                                                                                                                                                                                                                                                                                                                                                                                                                                                                                                         | ADDITIONAL CONSIDERATIONS |
|-------------------------------------------------------------------------------------------------------------------------------------------------------------------------------------------------------------------------------------------------------------------------------------------------|---------------------------------------------------------------------------------------------------------------------------------------------------------------------------------------------------------------------------------------------------------------------------------------------------------------------------------------------------------------------------------------------------------------------------------------------------------------------------------------------------------------------------------------------------------------------------------------------------------------------------------------------------------------------------|---------------------------|
| <input type="radio"/> Large costs<br><input checked="" type="radio"/> Moderate costs<br><input type="radio"/> Negligible costs and savings<br><input type="radio"/> Moderate savings<br><input type="radio"/> Large savings<br><input type="radio"/> Varies<br><input type="radio"/> Don't know | The estimated costs of providing a domiciliary NIV service are reported in Table 34 and for NIV were £2373 in the first year and £1536 in subsequent years. This estimate was in between cost estimates reported in the two studies identified in the clinical review. Tuggey et al. (2003) <sup>40</sup> estimate domiciliary NIV to cost £1060 per year in 2003 prices, which converts to £1344 in 2012 prices (assuming a 3% inflation rate), and Clini et al. (2009) <sup>134</sup> estimated NIV to cost €1920 in 2008 prices, which converts to £2727 (converting to GBP at the mid-year conversion rate of 1.263168 and inflating to 2012 prices at a rate of 3%). |                           |

## Certainty of evidence of required resources

What is the certainty of the evidence of resource requirements (costs)?

| JUDGEMENT                                                                                                                                                                           | RESEARCH EVIDENCE | ADDITIONAL CONSIDERATIONS                                                                         |
|-------------------------------------------------------------------------------------------------------------------------------------------------------------------------------------|-------------------|---------------------------------------------------------------------------------------------------|
| <input type="radio"/> Very low<br><input checked="" type="radio"/> Low<br><input type="radio"/> Moderate<br><input type="radio"/> High<br><input type="radio"/> No included studies |                   | Low certainty as the cost and availability of resources for NIV may vary greatly across settings. |

## Cost effectiveness

Does the cost-effectiveness of the intervention favor the intervention or the comparison?

| JUDGEMENT                                                                                                                                                                                                                                                                                                                                                                                | RESEARCH EVIDENCE                                                                                                                                                                                                                                                                                                                                                                                                                                                                                                                                                                                                                                                                                                           | ADDITIONAL CONSIDERATIONS                                                                                                                                                 |
|------------------------------------------------------------------------------------------------------------------------------------------------------------------------------------------------------------------------------------------------------------------------------------------------------------------------------------------------------------------------------------------|-----------------------------------------------------------------------------------------------------------------------------------------------------------------------------------------------------------------------------------------------------------------------------------------------------------------------------------------------------------------------------------------------------------------------------------------------------------------------------------------------------------------------------------------------------------------------------------------------------------------------------------------------------------------------------------------------------------------------------|---------------------------------------------------------------------------------------------------------------------------------------------------------------------------|
| <input type="radio"/> Favors the comparison<br><input type="radio"/> Probably favors the comparison<br><input type="radio"/> Does not favor either the intervention or the comparison<br><input checked="" type="radio"/> Probably favors the intervention<br><input type="radio"/> Favors the intervention<br><input type="radio"/> Varies<br><input type="radio"/> No included studies | Economic modelling suggested that NIV may be cost-effective in a stable population at a threshold of £30,000 per quality-adjusted life-year (QALY) gained (incremental cost-effectiveness ratio £28,162), but this is associated with uncertainty. In the case of the post-hospital population, results for three separate base cases ranged from usual care dominating to NIV being cost-effective, with an incremental cost-effectiveness ratio of less than £10,000 per QALY gained. All estimates were sensitive suggested that reductions in the rate of hospital admissions per patient per year of 24% and 15% in the stable and post-hospital populations, respectively, are required for NIV to be cost-effective. | The group vacillated between "Favours the intervention" vs. "Probably favours the intervention." All agreed towards the side of cost effectiveness of NIV vs. comparison. |

## Equity

What would be the impact on health equity?

| JUDGEMENT                                                                                                                                                                                                                                                              | RESEARCH EVIDENCE | ADDITIONAL CONSIDERATIONS                                                                                                                                                                                                                                                                   |
|------------------------------------------------------------------------------------------------------------------------------------------------------------------------------------------------------------------------------------------------------------------------|-------------------|---------------------------------------------------------------------------------------------------------------------------------------------------------------------------------------------------------------------------------------------------------------------------------------------|
| <input type="radio"/> Reduced<br><input type="radio"/> Probably reduced<br><input type="radio"/> Probably no impact<br><input type="radio"/> Probably increased<br><input type="radio"/> Increased<br><input type="radio"/> Varies<br><input type="radio"/> Don't know |                   | COPD patients disproportionately come from disadvantaged populations, so treating COPD may improve equity. In low or middle income countries/populations, home NIV may not be feasible and a recommendation for NIV may exacerbate health equity vs. more financially advantageous regions. |

## Acceptability

Is the intervention acceptable to key stakeholders?

| JUDGEMENT                                                                                                                                                                                                       | RESEARCH EVIDENCE | ADDITIONAL CONSIDERATIONS                                                                                                                                                                                                                                                                                   |
|-----------------------------------------------------------------------------------------------------------------------------------------------------------------------------------------------------------------|-------------------|-------------------------------------------------------------------------------------------------------------------------------------------------------------------------------------------------------------------------------------------------------------------------------------------------------------|
| <input type="radio"/> No<br><input type="radio"/> Probably no<br><input type="radio"/> Probably yes<br><input checked="" type="radio"/> Yes<br><input type="radio"/> Varies<br><input type="radio"/> Don't know |                   | <p>Many clinicians would find NIV acceptable due to its use in acute exacerbations-- it is a familiar therapy to those who treat COPD.</p> <p>Patients may vary with regard to acceptability of NIV in the long-term settings, however if it improves dyspnea and quality of life it may be acceptable.</p> |

## Feasibility

Is the intervention feasible to implement?

| JUDGEMENT                                                                                                                                                                                                       | RESEARCH EVIDENCE | ADDITIONAL CONSIDERATIONS                                                                                                                                                                                                                                            |
|-----------------------------------------------------------------------------------------------------------------------------------------------------------------------------------------------------------------|-------------------|----------------------------------------------------------------------------------------------------------------------------------------------------------------------------------------------------------------------------------------------------------------------|
| <input type="radio"/> No<br><input type="radio"/> Probably no<br><input type="radio"/> Probably yes<br><input type="radio"/> Yes<br><input checked="" type="radio"/> Varies<br><input type="radio"/> Don't know |                   | <p>Some regions may not have infrastructure to support this; however there is widespread use of NIV in other countries which can provide practice models to guide practice. This will vary depending on the health care system, resources, and patient location.</p> |

## SUMMARY OF JUDGEMENTS

|                       | JUDGEMENT                            |                                               |                                                          |                                         |                         |        |                     |
|-----------------------|--------------------------------------|-----------------------------------------------|----------------------------------------------------------|-----------------------------------------|-------------------------|--------|---------------------|
| PROBLEM               | No                                   | Probably no                                   | Probably yes                                             | Yes                                     |                         | Varies | Don't know          |
| DESIRABLE EFFECTS     | Trivial                              | Small                                         | Moderate                                                 | Large                                   |                         | Varies | Don't know          |
| UNDESIRABLE EFFECTS   | Large                                | Moderate                                      | Small                                                    | Trivial                                 |                         | Varies | Don't know          |
| CERTAINTY OF EVIDENCE | Very low                             | Low                                           | Moderate                                                 | High                                    |                         |        | No included studies |
| VALUES                | Important uncertainty or variability | Possibly important uncertainty or variability | Probably no important uncertainty or variability         | No important uncertainty or variability |                         |        |                     |
| BALANCE OF EFFECTS    | Favors the comparison                | Probably favors the comparison                | Does not favor either the intervention or the comparison | Probably favors the intervention        | Favors the intervention | Varies | Don't know          |

|                                             |                       |                                |                                                          |                                  |                         |        |                     |
|---------------------------------------------|-----------------------|--------------------------------|----------------------------------------------------------|----------------------------------|-------------------------|--------|---------------------|
| RESOURCES REQUIRED                          | Large costs           | Moderate costs                 | Negligible costs and savings                             | Moderate savings                 | Large savings           | Varies | Don't know          |
| CERTAINTY OF EVIDENCE OF REQUIRED RESOURCES | Very low              | Low                            | Moderate                                                 | High                             |                         |        | No included studies |
| COST EFFECTIVENESS                          | Favors the comparison | Probably favors the comparison | Does not favor either the intervention or the comparison | Probably favors the intervention | Favors the intervention | Varies | No included studies |
| EQUITY                                      | Reduced               | Probably reduced               | Probably no impact                                       | Probably increased               | Increased               | Varies | Don't know          |
| ACCEPTABILITY                               | No                    | Probably no                    | Probably yes                                             | Yes                              |                         | Varies | Don't know          |
| FEASIBILITY                                 | No                    | Probably no                    | Probably yes                                             | Yes                              |                         | Varies | Don't know          |

TYPE OF RECOMMENDATION

|                                                     |                                                          |                                                                               |                                                      |                                                 |
|-----------------------------------------------------|----------------------------------------------------------|-------------------------------------------------------------------------------|------------------------------------------------------|-------------------------------------------------|
| Strong recommendation against the intervention<br>○ | Conditional recommendation against the intervention<br>○ | Conditional recommendation for either the intervention or the comparison<br>○ | Conditional recommendation for the intervention<br>● | Strong recommendation for the intervention<br>○ |
|-----------------------------------------------------|----------------------------------------------------------|-------------------------------------------------------------------------------|------------------------------------------------------|-------------------------------------------------|

CONCLUSIONS

Recommendation

The ERS TF suggests long-term NIV be used for patients with chronic stable hypercapnic COPD (conditional recommendation, low certainty evidence).

Justification

Most outcomes favour NIV, including patient-important outcomes of dyspnea, QOL, exercise tolerance, with reassuring signal for mortality and exacerbations (towards benefit of NIV), and few harms (minor reduction in sleep efficacy and minor adverse events). Factors such as cost, acceptability, feasibility probably in favour though could vary between patients and settings. Overall balance of effects favour NIV though certainty of evidence is low, hence the panel chose a conditional/weak recommendation for NIV only; this allows a tailored approach to patient and setting-specific conditions as well.

## Subgroup considerations

We examined the subgroup of studies which targeted normal CO<sub>2</sub> (generally newer studies). The signal if anything was for more benefit of NIV if lower CO<sub>2</sub> targeted, again suggesting hypercapnic patients derive the most benefit from NIV.

## Implementation considerations

The panel recognized that the acceptability, feasibility, and costs of NIV vary greatly. For some patients and clinicians, the potential benefits (dyspnea, QOL, exercise tolerance; possible reduction in hospitalizations, though imprecise evidence) may not be worth it. This is consistent with a conditional recommendation in GRADE.

## Monitoring and evaluation

See research priorities, below.

## Research priorities

- 1) Strategies for initiating NIV. It is obvious that ventilator setting and acclimatization to NIV are crucial for effectiveness, including better adherence. NIV may be initiated in the hospital or at home. In-hospital initiation can be easily performed in some centers; however, it is more expensive and complex.
- 2) The benefits of NIV in subgroups of patients with COPD. The variability of both adherence and treatment response may vary according to different clinical phenotypes. Indeed, it seems that the response is better in those patients with PaCO<sub>2</sub> > 50mmHg and PaCO<sub>2</sub> reduction to normal following NIV. A phenogrouping strategy of hypercapnic COPD subgroups is needed for better defined the populations to be prioritized in further studies.
- 3) The impact of comorbid conditions in this population e.g. the effect of obesity, OSA-overlap, cardiovascular diseases, and clinical frailty upon clinical outcome.
- 4) Assessment of other underestimated factors, such as lack of social support and patient-ventilator asynchrony, which may impact the effectiveness of long-term NIV.
- 5) Cost effectiveness studies reporting the health economic value of long-term NIV in chronic stable COPD.

## QUESTION

**Should Long-term NIV vs. usual care be used for patients with COPD after an acute hypercapnic respiratory failure episode?**

|                               |                                                                                                                                                           |
|-------------------------------|-----------------------------------------------------------------------------------------------------------------------------------------------------------|
| <b>POPULATION:</b>            | patients with COPD after an acute hypercapnic respiratory failure episode                                                                                 |
| <b>INTERVENTION:</b>          | Long-term NIV                                                                                                                                             |
| <b>COMPARISON:</b>            | usual care                                                                                                                                                |
| <b>MAIN OUTCOMES:</b>         | Mortality; Exacerbations; Hospitalizations; Dyspnea score; Quality of Life; PaO <sub>2</sub> ; PaCO <sub>2</sub> ; Exercise tolerance; FEV <sub>1</sub> ; |
| <b>SETTING:</b>               |                                                                                                                                                           |
| <b>PERSPECTIVE:</b>           |                                                                                                                                                           |
| <b>BACKGROUND:</b>            |                                                                                                                                                           |
| <b>CONFLICT OF INTERESTS:</b> |                                                                                                                                                           |

## ASSESSMENT

| <b>Problem</b><br>Is the problem a priority?                                                                                                                                                                    |                                                                                                                                                                                                                                                                          |                                                                                                                                                                                                                                                                                     |
|-----------------------------------------------------------------------------------------------------------------------------------------------------------------------------------------------------------------|--------------------------------------------------------------------------------------------------------------------------------------------------------------------------------------------------------------------------------------------------------------------------|-------------------------------------------------------------------------------------------------------------------------------------------------------------------------------------------------------------------------------------------------------------------------------------|
| JUDGEMENT                                                                                                                                                                                                       | RESEARCH EVIDENCE                                                                                                                                                                                                                                                        | ADDITIONAL CONSIDERATIONS                                                                                                                                                                                                                                                           |
| <input type="radio"/> No<br><input type="radio"/> Probably no<br><input type="radio"/> Probably yes<br><input checked="" type="radio"/> Yes<br><input type="radio"/> Varies<br><input type="radio"/> Don't know |                                                                                                                                                                                                                                                                          | The panel decided on these PICO questions in advance of the guideline meeting on the basis of their importance to clinical practice.                                                                                                                                                |
| <b>Desirable Effects</b><br>How substantial are the desirable anticipated effects?                                                                                                                              |                                                                                                                                                                                                                                                                          |                                                                                                                                                                                                                                                                                     |
| JUDGEMENT                                                                                                                                                                                                       | RESEARCH EVIDENCE                                                                                                                                                                                                                                                        | ADDITIONAL CONSIDERATIONS                                                                                                                                                                                                                                                           |
| <input type="radio"/> Trivial<br><input type="radio"/> Small<br><input checked="" type="radio"/> Moderate<br><input type="radio"/> Large<br><input type="radio"/> Varies<br><input type="radio"/> Don't know    | <b>Desirable effect</b><br>Exacerbations-- small reduction, but imprecise (SMD -0.19 exacerbations, -0.4 to 0.01)<br>Hospitalizations-- small reduction, but imprecise (RR 0.61, 95%CI 0.30 to 1.24)<br>Reduction in PCO <sub>2</sub> (-3.41 mmHg)<br>Dyspnea (MD -0.80) | Limited evidence based for this discussion. Small sample size and number of trials limit precision. May be a reduction in exacerbations and hospitalizations but limited by imprecision; other patient important outcomes likely also favour NIV but again issues with imprecision. |

|  |                                                                                                                                                                                                   |                                                                                                                                                                                                                                                                                                                                                                                                                                                                                                                                                                                                                                                                                                                                                                                             |
|--|---------------------------------------------------------------------------------------------------------------------------------------------------------------------------------------------------|---------------------------------------------------------------------------------------------------------------------------------------------------------------------------------------------------------------------------------------------------------------------------------------------------------------------------------------------------------------------------------------------------------------------------------------------------------------------------------------------------------------------------------------------------------------------------------------------------------------------------------------------------------------------------------------------------------------------------------------------------------------------------------------------|
|  | <p>Quality of life (MD -2.89 measured using SRI)</p> <p><b>Undesirable effect</b><br/>PO2 MD 1.53 mmHg</p> <p><b>Little to no effect</b><br/>Mortality RR 0.92<br/>Exercise tolerance MD 8.64</p> | <p>Inclusion of Chung study which is considered to be at high risk of bias may limit interpretation of some outcome (eg. exacerbations). Sensitivity analysis including and excluding Chung has minimal impact upon point estimates; including increases precision slightly.</p> <p>Timing of initiation is also an important consideration-- HOT-HMV demonstrated reduction in exacerbations in select population of patients who remain hypercapnic ~2-4 weeks after their exacerbation; this is the subgroup most likely to benefit and possibly why smaller benefits seen with Struik. Sensitivity analysis excluding RESCUE trial demonstrates statistical significance for reduction in events; unfortunately no subgroup of persistent hypercapnia from Struik et al to compare.</p> |
|--|---------------------------------------------------------------------------------------------------------------------------------------------------------------------------------------------------|---------------------------------------------------------------------------------------------------------------------------------------------------------------------------------------------------------------------------------------------------------------------------------------------------------------------------------------------------------------------------------------------------------------------------------------------------------------------------------------------------------------------------------------------------------------------------------------------------------------------------------------------------------------------------------------------------------------------------------------------------------------------------------------------|

## Undesirable Effects

How substantial are the undesirable anticipated effects?

| JUDGEMENT                                                                                                                                                                                                                               | RESEARCH EVIDENCE                                                                                                                                                                                                                                                                                                                                                                                                                                                      | ADDITIONAL CONSIDERATIONS                                                                                                                                                                                                                                                                                                              |
|-----------------------------------------------------------------------------------------------------------------------------------------------------------------------------------------------------------------------------------------|------------------------------------------------------------------------------------------------------------------------------------------------------------------------------------------------------------------------------------------------------------------------------------------------------------------------------------------------------------------------------------------------------------------------------------------------------------------------|----------------------------------------------------------------------------------------------------------------------------------------------------------------------------------------------------------------------------------------------------------------------------------------------------------------------------------------|
| <p> <input type="radio"/> Large<br/> <input type="radio"/> Moderate<br/> <input checked="" type="radio"/> Small<br/> <input type="radio"/> Trivial<br/> <input type="radio"/> Varies<br/> <input type="radio"/> Don't know         </p> | <p><b>Desirable effect</b><br/>Exacerbations-- small reduction, but imprecise (SMD -0.19 exacerbations, -0.4 to 0.01)<br/>Hospitalizations-- small reduction, but imprecise (RR 0.61, 95%CI 0.30 to 1.24)<br/>Reduction in PCO2 (-3.41 mmHg)<br/>Dyspnea (MD -0.80)<br/>Quality of life (MD -2.89 measured using SRI)</p> <p><b>Undesirable effect</b><br/>PO2 MD 1.53 mmHg</p> <p><b>Little to no effect</b><br/>Mortality RR 0.92<br/>Exercise tolerance MD 8.64</p> | <p>Even though not reflected in this evidence base, adverse events from Q1 also apply here as indirect evidence as presumably the mask and interfaces have the same effects whether used early after exacerbation or later in stable phase.</p> <p>Its possible that newer techniques and newer interfaces have less side effects.</p> |

## Certainty of evidence

What is the overall certainty of the evidence of effects?

| JUDGEMENT                                                                                 | RESEARCH EVIDENCE                               | ADDITIONAL CONSIDERATIONS |
|-------------------------------------------------------------------------------------------|-------------------------------------------------|---------------------------|
| <p> <input type="radio"/> Very low<br/> <input checked="" type="radio"/> Low         </p> | Low for almost all outcomes due to imprecision. |                           |



|                                                                                                           |  |  |
|-----------------------------------------------------------------------------------------------------------|--|--|
| <input type="radio"/> Moderate<br><input type="radio"/> High<br><input type="radio"/> No included studies |  |  |
|-----------------------------------------------------------------------------------------------------------|--|--|

## Values

Is there important uncertainty about or variability in how much people value the main outcomes?

| JUDGEMENT                                                                                                                                                                                                                                                                               | RESEARCH EVIDENCE                                                                                                                                                                                    | ADDITIONAL CONSIDERATIONS |
|-----------------------------------------------------------------------------------------------------------------------------------------------------------------------------------------------------------------------------------------------------------------------------------------|------------------------------------------------------------------------------------------------------------------------------------------------------------------------------------------------------|---------------------------|
| <input type="radio"/> Important uncertainty or variability<br><input checked="" type="radio"/> Possibly important uncertainty or variability<br><input type="radio"/> Probably no important uncertainty or variability<br><input type="radio"/> No important uncertainty or variability | Exacerbations, dyspnea, and quality of life are among the most important outcomes in patients with COPD. Symptom relief was generally found to be more important than adverse events. PMID: 30002103 |                           |

## Balance of effects

Does the balance between desirable and undesirable effects favor the intervention or the comparison?

| JUDGEMENT                                                                                                                                                                                                                                                                                                                                                                       | RESEARCH EVIDENCE | ADDITIONAL CONSIDERATIONS                                                                                                                                                                                                                                                                                                                                                                                                                                                                                                                      |
|---------------------------------------------------------------------------------------------------------------------------------------------------------------------------------------------------------------------------------------------------------------------------------------------------------------------------------------------------------------------------------|-------------------|------------------------------------------------------------------------------------------------------------------------------------------------------------------------------------------------------------------------------------------------------------------------------------------------------------------------------------------------------------------------------------------------------------------------------------------------------------------------------------------------------------------------------------------------|
| <input type="radio"/> Favors the comparison<br><input type="radio"/> Probably favors the comparison<br><input type="radio"/> Does not favor either the intervention or the comparison<br><input checked="" type="radio"/> Probably favors the intervention<br><input type="radio"/> Favors the intervention<br><input type="radio"/> Varies<br><input type="radio"/> Don't know |                   | <p>Probably favors the intervention, especially in subgroup of patients with persistent hypercapnia 2-4 weeks post exacerbation as seen in HOT-HMV trial. Reduction of events is of great importance to patients. Possibly improvements in QOL and dyspnea as well. All outcomes limited by imprecision.</p> <p>Also, little evidence of harm from NIV-- suspect that still occurs-- will assume similar rates of minor adverse reactions as in PICO 1, as mask fit etc. likely similar in post-exacerbation as chronic stable population.</p> |

## Resources required

How large are the resource requirements (costs)?

| JUDGEMENT                                                                                                                                  | RESEARCH EVIDENCE                                                                                                                                                                                                           | ADDITIONAL CONSIDERATIONS |
|--------------------------------------------------------------------------------------------------------------------------------------------|-----------------------------------------------------------------------------------------------------------------------------------------------------------------------------------------------------------------------------|---------------------------|
| <input type="radio"/> Large costs<br><input checked="" type="radio"/> Moderate costs<br><input type="radio"/> Negligible costs and savings | The estimated costs of providing a domiciliary NIV service are reported in Table 34 and for NIV were £2373 in the first year and £1536 in subsequent years. This estimate was in between cost estimates reported in the two |                           |

|                                                                                                                                                   |                                                                                                                                                                                                                                                                                                                                                                                                                                               |  |
|---------------------------------------------------------------------------------------------------------------------------------------------------|-----------------------------------------------------------------------------------------------------------------------------------------------------------------------------------------------------------------------------------------------------------------------------------------------------------------------------------------------------------------------------------------------------------------------------------------------|--|
| <input type="radio"/> Moderate savings<br><input type="radio"/> Large savings<br><input type="radio"/> Varies<br><input type="radio"/> Don't know | studies identified in the clinical review. Tuggey et al. (2003) <sup>40</sup> estimate domiciliary NIV to cost £1060 per year in 2003 prices, which converts to £1344 in 2012 prices (assuming a 3% inflation rate), and Clini et al. (2009) <sup>134</sup> estimated NIV to cost €1920 in 2008 prices, which converts to £2727 (converting to GBP at the mid-year conversion rate of 1.263168 and inflating to 2012 prices at a rate of 3%). |  |
|---------------------------------------------------------------------------------------------------------------------------------------------------|-----------------------------------------------------------------------------------------------------------------------------------------------------------------------------------------------------------------------------------------------------------------------------------------------------------------------------------------------------------------------------------------------------------------------------------------------|--|

## Certainty of evidence of required resources

What is the certainty of the evidence of resource requirements (costs)?

| JUDGEMENT                                                                                                                                                                           | RESEARCH EVIDENCE | ADDITIONAL CONSIDERATIONS                                                                         |
|-------------------------------------------------------------------------------------------------------------------------------------------------------------------------------------|-------------------|---------------------------------------------------------------------------------------------------|
| <input type="radio"/> Very low<br><input checked="" type="radio"/> Low<br><input type="radio"/> Moderate<br><input type="radio"/> High<br><input type="radio"/> No included studies |                   | Low certainty as the cost and availability of resources for NIV may vary greatly across settings. |

## Cost effectiveness

Does the cost-effectiveness of the intervention favor the intervention or the comparison?

| JUDGEMENT                                                                                                                                                                                                                                                                                                                                                                                | RESEARCH EVIDENCE                                                                                                                                                                                                                                                                                                                                                                                                                                                                                                                                                                                                                                                                                                                                                                                                | ADDITIONAL CONSIDERATIONS                                                                                           |
|------------------------------------------------------------------------------------------------------------------------------------------------------------------------------------------------------------------------------------------------------------------------------------------------------------------------------------------------------------------------------------------|------------------------------------------------------------------------------------------------------------------------------------------------------------------------------------------------------------------------------------------------------------------------------------------------------------------------------------------------------------------------------------------------------------------------------------------------------------------------------------------------------------------------------------------------------------------------------------------------------------------------------------------------------------------------------------------------------------------------------------------------------------------------------------------------------------------|---------------------------------------------------------------------------------------------------------------------|
| <input type="radio"/> Favors the comparison<br><input type="radio"/> Probably favors the comparison<br><input type="radio"/> Does not favor either the intervention or the comparison<br><input checked="" type="radio"/> Probably favors the intervention<br><input type="radio"/> Favors the intervention<br><input type="radio"/> Varies<br><input type="radio"/> No included studies | Economic modelling suggested that NIV may be cost-effective in a stable population at a threshold of £30,000 per quality-adjusted life-year (QALY) gained (incremental cost-effectiveness ratio £28,162), but this is associated with uncertainty. In the case of the post-hospital population, results for three separate base cases ranged from usual care dominating to NIV being cost-effective, with an incremental cost-effectiveness ratio of less than £10,000 per QALY gained. All estimates were sensitive to effectiveness estimates, length of benefit from NIV (currently unknown) and some costs. Modelling suggested that reductions in the rate of hospital admissions per patient per year of 24% and 15% in the stable and post-hospital populations, respectively, are required for NIV to be | Probably favours NIV in hypercapnic, "frequent flyer" population with recurrent hospitalizations and exacerbations. |

|                                                                                                                                                                                                                                                                                                       |                          |                                                                                                                                                                                                                                                                                                                                                                                                                                                                                                             |
|-------------------------------------------------------------------------------------------------------------------------------------------------------------------------------------------------------------------------------------------------------------------------------------------------------|--------------------------|-------------------------------------------------------------------------------------------------------------------------------------------------------------------------------------------------------------------------------------------------------------------------------------------------------------------------------------------------------------------------------------------------------------------------------------------------------------------------------------------------------------|
| cost-effective                                                                                                                                                                                                                                                                                        |                          |                                                                                                                                                                                                                                                                                                                                                                                                                                                                                                             |
| <b>Equity</b><br>What would be the impact on health equity?                                                                                                                                                                                                                                           |                          |                                                                                                                                                                                                                                                                                                                                                                                                                                                                                                             |
| <b>JUDGEMENT</b><br><input type="radio"/> Reduced<br><input type="radio"/> Probably reduced<br><input type="radio"/> Probably no impact<br><input type="radio"/> Probably increased<br><input type="radio"/> Increased<br><input checked="" type="radio"/> Varies<br><input type="radio"/> Don't know | <b>RESEARCH EVIDENCE</b> | <b>ADDITIONAL CONSIDERATIONS</b><br>COPD patients disproportionately come from disadvantaged populations, so treating COPD may improve equity. In low or middle income countries/populations, home NIV may not be feasible and a recommendation for NIV may exacerbate health equity vs. more financially advantageous regions.                                                                                                                                                                             |
| <b>Acceptability</b><br>Is the intervention acceptable to key stakeholders?                                                                                                                                                                                                                           |                          |                                                                                                                                                                                                                                                                                                                                                                                                                                                                                                             |
| <b>JUDGEMENT</b><br><input type="radio"/> No<br><input type="radio"/> Probably no<br><input checked="" type="radio"/> Probably yes<br><input type="radio"/> Yes<br><input type="radio"/> Varies<br><input type="radio"/> Don't know                                                                   | <b>RESEARCH EVIDENCE</b> | <b>ADDITIONAL CONSIDERATIONS</b><br>Many clinicians would find NIV acceptable due to its use in acute exacerbations-- it is a familiar therapy to those who treat COPD. This may be more acceptable in this post-acute exacerbation setting than the chronic COPD setting as the transition from acute to long-term NIV.<br><br>Patients may vary with regard to acceptability of NIV in the long-term settings, however if it improves dyspnea and quality of life and exacerbations it may be acceptable. |
| <b>Feasibility</b><br>Is the intervention feasible to implement?                                                                                                                                                                                                                                      |                          |                                                                                                                                                                                                                                                                                                                                                                                                                                                                                                             |
| <b>JUDGEMENT</b><br><input type="radio"/> No<br><input type="radio"/> Probably no<br><input checked="" type="radio"/> Probably yes<br><input type="radio"/> Yes<br><input type="radio"/> Varies<br><input type="radio"/> Don't know                                                                   | <b>RESEARCH EVIDENCE</b> | <b>ADDITIONAL CONSIDERATIONS</b><br>May be more feasible than Q1 as clinical pathways exist pre- and post-discharge to facilitate initiation of NIV (eg. inpatient respiratory consultation, arrange for equipment while still in hospital, etc).                                                                                                                                                                                                                                                           |

## SUMMARY OF JUDGEMENTS

|         | JUDGEMENT |             |              |     |  |        |            |
|---------|-----------|-------------|--------------|-----|--|--------|------------|
| PROBLEM | No        | Probably no | Probably yes | Yes |  | Varies | Don't know |

|                                                    |                                      |                                                      |                                                          |                                         |                         |               |                     |
|----------------------------------------------------|--------------------------------------|------------------------------------------------------|----------------------------------------------------------|-----------------------------------------|-------------------------|---------------|---------------------|
| <b>DESIRABLE EFFECTS</b>                           | Trivial                              | Small                                                | <b>Moderate</b>                                          | Large                                   |                         | Varies        | Don't know          |
| <b>UNDESIRABLE EFFECTS</b>                         | Large                                | Moderate                                             | <b>Small</b>                                             | Trivial                                 |                         | Varies        | Don't know          |
| <b>CERTAINTY OF EVIDENCE</b>                       | Very low                             | <b>Low</b>                                           | Moderate                                                 | High                                    |                         |               | No included studies |
| <b>VALUES</b>                                      | Important uncertainty or variability | <b>Possibly important uncertainty or variability</b> | Probably no important uncertainty or variability         | No important uncertainty or variability |                         |               |                     |
| <b>BALANCE OF EFFECTS</b>                          | Favors the comparison                | Probably favors the comparison                       | Does not favor either the intervention or the comparison | <b>Probably favors the intervention</b> | Favors the intervention | Varies        | Don't know          |
| <b>RESOURCES REQUIRED</b>                          | Large costs                          | <b>Moderate costs</b>                                | Negligible costs and savings                             | Moderate savings                        | Large savings           | Varies        | Don't know          |
| <b>CERTAINTY OF EVIDENCE OF REQUIRED RESOURCES</b> | Very low                             | <b>Low</b>                                           | Moderate                                                 | High                                    |                         |               | No included studies |
| <b>COST EFFECTIVENESS</b>                          | Favors the comparison                | Probably favors the comparison                       | Does not favor either the intervention or the comparison | <b>Probably favors the intervention</b> | Favors the intervention | Varies        | No included studies |
| <b>EQUITY</b>                                      | Reduced                              | Probably reduced                                     | Probably no impact                                       | Probably increased                      | Increased               | <b>Varies</b> | Don't know          |
| <b>ACCEPTABILITY</b>                               | No                                   | Probably no                                          | <b>Probably yes</b>                                      | Yes                                     |                         | Varies        | Don't know          |
| <b>FEASIBILITY</b>                                 | No                                   | Probably no                                          | <b>Probably yes</b>                                      | Yes                                     |                         | Varies        | Don't know          |

## TYPE OF RECOMMENDATION

|                                                     |                                                          |                                                                               |                                                             |                                                 |
|-----------------------------------------------------|----------------------------------------------------------|-------------------------------------------------------------------------------|-------------------------------------------------------------|-------------------------------------------------|
| Strong recommendation against the intervention<br>○ | Conditional recommendation against the intervention<br>○ | Conditional recommendation for either the intervention or the comparison<br>○ | <b>Conditional recommendation for the intervention</b><br>● | Strong recommendation for the intervention<br>○ |
|-----------------------------------------------------|----------------------------------------------------------|-------------------------------------------------------------------------------|-------------------------------------------------------------|-------------------------------------------------|

# CONCLUSIONS

## Recommendation

The ERS TF suggests long-term NIV be used in patients with COPD following a life-threatening episode of acute hypercapnic respiratory failure requiring acute NIV, if hypercapnia persists beyond 2-4 weeks following the episode (conditional recommendation, low certainty evidence).

## Justification

Generally low certainty of evidence, but most important outcomes are neutral (mortality, exercise tolerance) or favour NIV (exacerbations, hospitalizations, HRQOL measured using SRI) without any major harms seen. Reduction in events seen in HOT-HMV trial likely because that trial included patients with persistent hypercapnia some time (2-4 weeks) after event; unfortunately subgroup data from Struik/RESCUE study does not have equivalent subgroup data; NIV appears to result in statistically significant reduction in exacerbations in the persistent hypercapnic subgroup. Subgroup analysis excluding Cheung et al study (thought to be high risk of bias) does not significantly affect estimates. Overall less certainty of effects but desirable effects likely outweigh undesirable effects; given low certainty of evidence only conditional/week recommendation could be made, and this after considering patient values & preferences; acceptability, feasibility and cost of NIV in local setting. Future evidence could change this recommendation in the future.

## Subgroup considerations

Major issue is that subgroup of persistently hypercapnic patients from HOT-HMV appear to be most likely to benefit; this subgroup has statistically significant reduction in hospitalizations compared to Struik/RESCUE data.

## Implementation considerations

Patients who are started early may not remain hypercapnic; suggest that the group most likely to benefit from NIV is the group who remains hypercapnic 2-4 weeks after the episode, as seen in HOT-HMV. The panel recognized that the acceptability, feasibility, and costs of NIV vary greatly. For some patients and clinicians, the potential benefits (dyspnea, QOL, exercise tolerance; possible reduction in hospitalizations, though imprecise evidence) may not be worth it. This is consistent with a conditional recommendation in GRADE.

## Monitoring and evaluation

## Research priorities

1. Developing more accurate criteria for identifying patients who are likely to benefit from long-term NIV, such as severity of illness (hypothesis that treatment of higher PaCO<sub>2</sub> at initiation will drive greater clinical benefits), trajectory of hypercapnia recovery after exacerbation (as some patients return to eucapnia more rapidly than others) and treatment response (e.g. early reduction in PaCO<sub>2</sub> level after starting home NIV, with the hypothesis that greater reduction in PaCO<sub>2</sub> will drive greater clinical benefit).

2. Physiological and biological mechanisms of action of long-term NIV: physiological mechanisms determining reduction in PaCO<sub>2</sub>; the biological effects of PaCO<sub>2</sub> reduction in chronic hypercapnia upon immune, pulmonary vasculature, and skeletal muscle; biological mechanisms determining reduction in exacerbation; and physiological mechanisms determining enhanced sleep quality.

3. The effects of NIV upon mental health and cognition upon patients, including effects upon HRQL post ARF, cognitive function post-AHRF, the relationship between HRQL and cognitive function upon adherence and acceptability of home NIV.

4. Health service delivery research to promote the delivery of post-acute NIV to the right patient at the right time and prevent the 'overuse' or 'underuse' of the treatment.

5. Assessment of novel home treatments, e.g. high flow humidified nasal oxygen, that are capable of reducing PaCO<sub>2</sub> in stable hypercapnic COPD patients.

## QUESTION

**Should NIV with targeted normalization of PaCO<sub>2</sub> levels vs. NIV without targeting normal PaCO<sub>2</sub> level be used for long-term NIV in COPD patients?**

|                               |                                                                                                          |
|-------------------------------|----------------------------------------------------------------------------------------------------------|
| <b>POPULATION:</b>            | long-term NIV in COPD patients                                                                           |
| <b>INTERVENTION:</b>          | NIV with targeted normalization of PaCO <sub>2</sub> levels                                              |
| <b>COMPARISON:</b>            | NIV without targeting normal PaCO <sub>2</sub> level                                                     |
| <b>MAIN OUTCOMES:</b>         | Quality of Life; Dyspnea; FEV <sub>1</sub> ; PaCO <sub>2</sub> ; PaO <sub>2</sub> ; 6MWD; Sleep Comfort; |
| <b>SETTING:</b>               |                                                                                                          |
| <b>PERSPECTIVE:</b>           |                                                                                                          |
| <b>BACKGROUND:</b>            |                                                                                                          |
| <b>CONFLICT OF INTERESTS:</b> |                                                                                                          |

## ASSESSMENT

### Problem

Is the problem a priority?

| JUDGEMENT                                                                                                                                                                                                                                                                                | RESEARCH EVIDENCE | ADDITIONAL CONSIDERATIONS                                                                    |
|------------------------------------------------------------------------------------------------------------------------------------------------------------------------------------------------------------------------------------------------------------------------------------------|-------------------|----------------------------------------------------------------------------------------------|
| <ul style="list-style-type: none"><li><input type="radio"/> No</li><li><input type="radio"/> Probably no</li><li><input type="radio"/> Probably yes</li><li><input checked="" type="radio"/> Yes</li><li><input type="radio"/> Varies</li><li><input type="radio"/> Don't know</li></ul> |                   | The panel chose the PICO questions based upon their apparent relevance to clinical practice. |

### Desirable Effects

How substantial are the desirable anticipated effects?

| JUDGEMENT                                                                                                                                                                                                                                                                             | RESEARCH EVIDENCE                                                                                                                                                                          | ADDITIONAL CONSIDERATIONS                                                                                                                                                                                                                                                            |
|---------------------------------------------------------------------------------------------------------------------------------------------------------------------------------------------------------------------------------------------------------------------------------------|--------------------------------------------------------------------------------------------------------------------------------------------------------------------------------------------|--------------------------------------------------------------------------------------------------------------------------------------------------------------------------------------------------------------------------------------------------------------------------------------|
| <ul style="list-style-type: none"><li><input type="radio"/> Trivial</li><li><input checked="" type="radio"/> Small</li><li><input type="radio"/> Moderate</li><li><input type="radio"/> Large</li><li><input type="radio"/> Varies</li><li><input type="radio"/> Don't know</li></ul> | <p><b>Desirable effects</b><br/>Reduction in PaCO<sub>2</sub>, generally at rest (reduction 5 mmHg)</p> <p><b>Undesirable effects</b><br/>Slightly higher dyspnea scores in only 1 RCT</p> | Consider sensitivity analysis excluding Lukacovits 2012 as measurements for PaO <sub>2</sub> and PaCO <sub>2</sub> were measured during NIV.<br>Murphy looked at high-intensity vs. high-pressure. Thus substantial questions therefore raised about the directness of the evidence. |

|  |                                                                                                   |                                                                                                                                                                                                                                                                                                                                                                                               |
|--|---------------------------------------------------------------------------------------------------|-----------------------------------------------------------------------------------------------------------------------------------------------------------------------------------------------------------------------------------------------------------------------------------------------------------------------------------------------------------------------------------------------|
|  | <b>Minimal effect</b><br>Quality of life measured with SRI<br>Sleep quality<br>Exercise tolerance | The panel examined the studies from PICO 1 and the subgroup of studies which targeted normalization of CO2 vs. studies which did not target normalization. The subgroup which targeted normal CO2 demonstrated more benefit for NIV (ie effect sizes were larger in studies which targeted normal CO2).<br><br>The panel judged overall there may be a small benefit to targeting normal CO2. |
|--|---------------------------------------------------------------------------------------------------|-----------------------------------------------------------------------------------------------------------------------------------------------------------------------------------------------------------------------------------------------------------------------------------------------------------------------------------------------------------------------------------------------|

## Undesirable Effects

How substantial are the undesirable anticipated effects?

| JUDGEMENT                                                                                                                                                                                                    | RESEARCH EVIDENCE                                                                                                                                                                                                                                                               | ADDITIONAL CONSIDERATIONS                                                      |
|--------------------------------------------------------------------------------------------------------------------------------------------------------------------------------------------------------------|---------------------------------------------------------------------------------------------------------------------------------------------------------------------------------------------------------------------------------------------------------------------------------|--------------------------------------------------------------------------------|
| <input type="radio"/> Large<br><input type="radio"/> Moderate<br><input type="radio"/> Small<br><input checked="" type="radio"/> Trivial<br><input type="radio"/> Varies<br><input type="radio"/> Don't know | <b>Desirable effects</b><br>Reduction in PaCO2, generally at rest (reduction 5 mmHg)<br><br><b>Undesirable effects</b><br>Slightly higher dyspnea scores in only 1 RCT<br><br><b>Minimal effect</b><br>Quality of life measured with SRI<br>Sleep quality<br>Exercise tolerance | Trivial undesirable effects-- slightly higher dypnea scores in a single study. |

## Certainty of evidence

What is the overall certainty of the evidence of effects?

| JUDGEMENT                                                                                                                                                                           | RESEARCH EVIDENCE                                                                                                                                                         | ADDITIONAL CONSIDERATIONS |
|-------------------------------------------------------------------------------------------------------------------------------------------------------------------------------------|---------------------------------------------------------------------------------------------------------------------------------------------------------------------------|---------------------------|
| <input checked="" type="radio"/> Very low<br><input type="radio"/> Low<br><input type="radio"/> Moderate<br><input type="radio"/> High<br><input type="radio"/> No included studies | Very low certainty evidence. Less certainty as well because studies were generally short-term, without measuring effects upon mortality, hospitalizations, exacerbations. |                           |

## Values

Is there important uncertainty about or variability in how much people value the main outcomes?



| JUDGEMENT                                                                                                                                                                                                                                                                               | RESEARCH EVIDENCE                                                                                                                                                                                    | ADDITIONAL CONSIDERATIONS |
|-----------------------------------------------------------------------------------------------------------------------------------------------------------------------------------------------------------------------------------------------------------------------------------------|------------------------------------------------------------------------------------------------------------------------------------------------------------------------------------------------------|---------------------------|
| <input type="radio"/> Important uncertainty or variability<br><input checked="" type="radio"/> Possibly important uncertainty or variability<br><input type="radio"/> Probably no important uncertainty or variability<br><input type="radio"/> No important uncertainty or variability | Exacerbations, dyspnea, and quality of life are among the most important outcomes in patients with COPD. Symptom relief was generally found to be more important than adverse events. PMID: 30002103 |                           |

## Balance of effects

Does the balance between desirable and undesirable effects favor the intervention or the comparison?

| JUDGEMENT                                                                                                                                                                                                                                                                                                                                                                       | RESEARCH EVIDENCE | ADDITIONAL CONSIDERATIONS                                                                                                                           |
|---------------------------------------------------------------------------------------------------------------------------------------------------------------------------------------------------------------------------------------------------------------------------------------------------------------------------------------------------------------------------------|-------------------|-----------------------------------------------------------------------------------------------------------------------------------------------------|
| <input type="radio"/> Favors the comparison<br><input type="radio"/> Probably favors the comparison<br><input type="radio"/> Does not favor either the intervention or the comparison<br><input checked="" type="radio"/> Probably favors the intervention<br><input type="radio"/> Favors the intervention<br><input type="radio"/> Varies<br><input type="radio"/> Don't know |                   | While very low certainty of evidence of a small benefit, the anticipated harms are trivial, meaning the evidence probably favours the intervention. |

## Resources required

How large are the resource requirements (costs)?

| JUDGEMENT                                                                                                                                                                                                                                                                                       | RESEARCH EVIDENCE | ADDITIONAL CONSIDERATIONS                                                                                                                                               |
|-------------------------------------------------------------------------------------------------------------------------------------------------------------------------------------------------------------------------------------------------------------------------------------------------|-------------------|-------------------------------------------------------------------------------------------------------------------------------------------------------------------------|
| <input type="radio"/> Large costs<br><input type="radio"/> Moderate costs<br><input checked="" type="radio"/> Negligible costs and savings<br><input type="radio"/> Moderate savings<br><input type="radio"/> Large savings<br><input type="radio"/> Varies<br><input type="radio"/> Don't know |                   | Implimenting higher intensity CO2 reduction required more time in hospital in one study, though admittedly limited evidence. No formal analysis of cost in any studies. |

## Certainty of evidence of required resources

What is the certainty of the evidence of resource requirements (costs)?

| JUDGEMENT | RESEARCH EVIDENCE | ADDITIONAL CONSIDERATIONS |
|-----------|-------------------|---------------------------|
|-----------|-------------------|---------------------------|

|                                                                                                                                                                                                                                                               |  |  |
|---------------------------------------------------------------------------------------------------------------------------------------------------------------------------------------------------------------------------------------------------------------|--|--|
| <ul style="list-style-type: none"> <li><input checked="" type="radio"/> Very low</li> <li><input type="radio"/> Low</li> <li><input type="radio"/> Moderate</li> <li><input type="radio"/> High</li> <li><input type="radio"/> No included studies</li> </ul> |  |  |
|---------------------------------------------------------------------------------------------------------------------------------------------------------------------------------------------------------------------------------------------------------------|--|--|

## Cost effectiveness

Does the cost-effectiveness of the intervention favor the intervention or the comparison?

| JUDGEMENT                                                                                                                                                                                                                                                                                                                                                                                                                                                                      | RESEARCH EVIDENCE | ADDITIONAL CONSIDERATIONS                                                                                                                                                                                                                                                                      |
|--------------------------------------------------------------------------------------------------------------------------------------------------------------------------------------------------------------------------------------------------------------------------------------------------------------------------------------------------------------------------------------------------------------------------------------------------------------------------------|-------------------|------------------------------------------------------------------------------------------------------------------------------------------------------------------------------------------------------------------------------------------------------------------------------------------------|
| <ul style="list-style-type: none"> <li><input type="radio"/> Favors the comparison</li> <li><input type="radio"/> Probably favors the comparison</li> <li><input type="radio"/> Does not favor either the intervention or the comparison</li> <li><input type="radio"/> Probably favors the intervention</li> <li><input type="radio"/> Favors the intervention</li> <li><input type="radio"/> Varies</li> <li><input checked="" type="radio"/> No included studies</li> </ul> |                   | <p>Given lack of certainty of benefits, lack of evidence for costs, the task force could not provide a judgement of the cost-effectiveness of targeting normalization of CO2 levels. If targeting normal CO2 was technically challenging in a given setting, it may not be cost-effective.</p> |

## Equity

What would be the impact on health equity?

| JUDGEMENT                                                                                                                                                                                                                                                                                                                                                               | RESEARCH EVIDENCE | ADDITIONAL CONSIDERATIONS                                                                              |
|-------------------------------------------------------------------------------------------------------------------------------------------------------------------------------------------------------------------------------------------------------------------------------------------------------------------------------------------------------------------------|-------------------|--------------------------------------------------------------------------------------------------------|
| <ul style="list-style-type: none"> <li><input type="radio"/> Reduced</li> <li><input type="radio"/> Probably reduced</li> <li><input checked="" type="radio"/> Probably no impact</li> <li><input type="radio"/> Probably increased</li> <li><input type="radio"/> Increased</li> <li><input type="radio"/> Varies</li> <li><input type="radio"/> Don't know</li> </ul> |                   | <p>Probably no impact upon equity when implementing in a patient population already receiving NIV.</p> |

## Acceptability

Is the intervention acceptable to key stakeholders?

| JUDGEMENT                                                                                                                                                                                                       | RESEARCH EVIDENCE | ADDITIONAL CONSIDERATIONS                                                                                                                                                                                                                                                                                                                                         |
|-----------------------------------------------------------------------------------------------------------------------------------------------------------------------------------------------------------------|-------------------|-------------------------------------------------------------------------------------------------------------------------------------------------------------------------------------------------------------------------------------------------------------------------------------------------------------------------------------------------------------------|
| <input type="radio"/> No<br><input type="radio"/> Probably no<br><input type="radio"/> Probably yes<br><input checked="" type="radio"/> Yes<br><input type="radio"/> Varies<br><input type="radio"/> Don't know |                   | <p>This approach is probably acceptable to clinicians, who appreciate having a clear "target" for CO<sub>2</sub>. It makes physiologic sense to clinicians as well.</p> <p>Patients probably have no issues with acceptability unless settings need to be very high to achieve normal CO<sub>2</sub>; in such cases high-intensity NIV may not be acceptable.</p> |

## Feasibility

Is the intervention feasible to implement?

| JUDGEMENT                                                                                                                                                                                                       | RESEARCH EVIDENCE | ADDITIONAL CONSIDERATIONS                                                                                                                                                                                                                                                                                                               |
|-----------------------------------------------------------------------------------------------------------------------------------------------------------------------------------------------------------------|-------------------|-----------------------------------------------------------------------------------------------------------------------------------------------------------------------------------------------------------------------------------------------------------------------------------------------------------------------------------------|
| <input type="radio"/> No<br><input type="radio"/> Probably no<br><input type="radio"/> Probably yes<br><input checked="" type="radio"/> Yes<br><input type="radio"/> Varies<br><input type="radio"/> Don't know |                   | <p>In situations where NIV is planned, more targeting a significant reduction of CO<sub>2</sub> is feasible, though actual normalization of CO<sub>2</sub> levels is unlikely to be achieved for many patients, based upon the results of the included studies, which did not demonstrate complete normalization of CO<sub>2</sub>.</p> |

## SUMMARY OF JUDGEMENTS

|                       | JUDGEMENT                            |                                               |                                                          |                                         |                         |        |                     |
|-----------------------|--------------------------------------|-----------------------------------------------|----------------------------------------------------------|-----------------------------------------|-------------------------|--------|---------------------|
| PROBLEM               | No                                   | Probably no                                   | Probably yes                                             | Yes                                     |                         | Varies | Don't know          |
| DESIRABLE EFFECTS     | Trivial                              | Small                                         | Moderate                                                 | Large                                   |                         | Varies | Don't know          |
| UNDESIRABLE EFFECTS   | Large                                | Moderate                                      | Small                                                    | Trivial                                 |                         | Varies | Don't know          |
| CERTAINTY OF EVIDENCE | Very low                             | Low                                           | Moderate                                                 | High                                    |                         |        | No included studies |
| VALUES                | Important uncertainty or variability | Possibly important uncertainty or variability | Probably no important uncertainty or variability         | No important uncertainty or variability |                         |        |                     |
| BALANCE OF EFFECTS    | Favors the comparison                | Probably favors the comparison                | Does not favor either the intervention or the comparison | Probably favors the intervention        | Favors the intervention | Varies | Don't know          |
| RESOURCES REQUIRED    | Large costs                          | Moderate costs                                | Negligible costs and savings                             | Moderate savings                        | Large savings           | Varies | Don't know          |
|                       |                                      |                                               |                                                          |                                         |                         |        |                     |

| CERTAINTY OF EVIDENCE OF REQUIRED RESOURCES | Very low              | Low                            | Moderate                                                 | High                             |                         |        | No included studies        |
|---------------------------------------------|-----------------------|--------------------------------|----------------------------------------------------------|----------------------------------|-------------------------|--------|----------------------------|
| COST EFFECTIVENESS                          | Favors the comparison | Probably favors the comparison | Does not favor either the intervention or the comparison | Probably favors the intervention | Favors the intervention | Varies | <b>No included studies</b> |
| EQUITY                                      | Reduced               | Probably reduced               | <b>Probably no impact</b>                                | Probably increased               | Increased               | Varies | Don't know                 |
| ACCEPTABILITY                               | No                    | Probably no                    | Probably yes                                             | <b>Yes</b>                       |                         | Varies | Don't know                 |
| FEASIBILITY                                 | No                    | Probably no                    | Probably yes                                             | <b>Yes</b>                       |                         | Varies | Don't know                 |

## TYPE OF RECOMMENDATION

|                                                                |                                                                     |                                                                                          |                                                                        |                                                            |
|----------------------------------------------------------------|---------------------------------------------------------------------|------------------------------------------------------------------------------------------|------------------------------------------------------------------------|------------------------------------------------------------|
| Strong recommendation against the intervention<br><div>○</div> | Conditional recommendation against the intervention<br><div>○</div> | Conditional recommendation for either the intervention or the comparison<br><div>○</div> | <b>Conditional recommendation for the intervention</b><br><div>●</div> | Strong recommendation for the intervention<br><div>○</div> |
|----------------------------------------------------------------|---------------------------------------------------------------------|------------------------------------------------------------------------------------------|------------------------------------------------------------------------|------------------------------------------------------------|

## CONCLUSIONS

### Recommendation

The ERS TF suggests titrating long-term NIV to normalize or reduce PaCO2 levels in patients with COPD (conditional recommendation, very low certainty evidence).

### Justification

We make a conditional recommendation due to the minimal potential harms of targeted normalization of CO2 and it is recognized that this is unlikely to be achieved in many patients. While high-intensity NIV may or may not have benefits, this is the approach most commonly used in many centres, and thus this is probably the most acceptable approach for many clinicianans. Setting NIV to target a reduction in PaCO2 may require more time spent in hospital and therefore possibly increase costs and decrease feasibility of NIV. Recognizing the lack of compelling evidence, the panel made a conditional recommendation for high-intensity NIV, but low-intensity approaches may also be acceptable and useful in many patients.

### Subgroup considerations

## Implementation considerations

It is likely reasonable for initially aim for a normal CO<sub>2</sub> in most patients, given the lack of harms and the possible, though very small, benefits with such an approach. If achieving normal CO<sub>2</sub> was very difficult or the settings very high and uncomfortable for the patient, targeting normal CO<sub>2</sub> may not worth lots of effort to achieve.

## Monitoring and evaluation

## Research priorities

1) The impact of NIV ventilator strategy targeted to maximise PaCO<sub>2</sub> reduction compared to conventional ventilator modes on long-term clinical outcomes (i.e. hyperinflation, exacerbations, cardiovascular complications, hospitalisations, survival, costs, patient's adherence).

## QUESTION

**Should Adaptive volume-targeted NIV vs. conventional NIV be used for long-term NIV in patients with COPD?**

|                               |                                                                                      |
|-------------------------------|--------------------------------------------------------------------------------------|
| <b>POPULATION:</b>            | long-term NIV in patients with COPD                                                  |
| <b>INTERVENTION:</b>          | Adaptive volume-targeted NIV                                                         |
| <b>COMPARISON:</b>            | conventional NIV                                                                     |
| <b>MAIN OUTCOMES:</b>         | Quality of Life; Sleep quality; Exercise tolerance; PaCO <sub>2</sub> ; Oxygenation; |
| <b>SETTING:</b>               |                                                                                      |
| <b>PERSPECTIVE:</b>           |                                                                                      |
| <b>BACKGROUND:</b>            |                                                                                      |
| <b>CONFLICT OF INTERESTS:</b> |                                                                                      |

## ASSESSMENT

### Problem

Is the problem a priority?

| JUDGEMENT                                                                                                                                                                                                       | RESEARCH EVIDENCE | ADDITIONAL CONSIDERATIONS                                                                                                                                                                                                                                                                                                                                                                                                                                                                                                                                                                                                                                                                                                                             |
|-----------------------------------------------------------------------------------------------------------------------------------------------------------------------------------------------------------------|-------------------|-------------------------------------------------------------------------------------------------------------------------------------------------------------------------------------------------------------------------------------------------------------------------------------------------------------------------------------------------------------------------------------------------------------------------------------------------------------------------------------------------------------------------------------------------------------------------------------------------------------------------------------------------------------------------------------------------------------------------------------------------------|
| <input type="radio"/> No<br><input type="radio"/> Probably no<br><input type="radio"/> Probably yes<br><input type="radio"/> Yes<br><input type="radio"/> Varies<br><input checked="" type="radio"/> Don't know |                   | <p>Question about variable modes is clearly important, however most modes are not studied,</p> <p>All studies in the systematic reviewer compared volume-targeted ventilator modes. The number of studies looking at these modes may reflect the desire of industry to find evidence to support these modes, rather than patient or clinician needs. Safety is the priority question given that these modes could result in hypoventilation or result in large leaks.</p> <p>The studies included in PICO 1-3 generally used fixed-pressure modes, making the applicability of evidence for these questions uncertain for auto-titrating modes: there is no long-term evidence of the impact of these modes upon mortality, hospitalizations etc.</p> |

### Desirable Effects

How substantial are the desirable anticipated effects?

| JUDGEMENT                                                                                                                                                                                                                                                                                    | RESEARCH EVIDENCE                                                                                                                                                                                                                                                                      | ADDITIONAL CONSIDERATIONS |
|----------------------------------------------------------------------------------------------------------------------------------------------------------------------------------------------------------------------------------------------------------------------------------------------|----------------------------------------------------------------------------------------------------------------------------------------------------------------------------------------------------------------------------------------------------------------------------------------|---------------------------|
| <ul style="list-style-type: none"> <li><input checked="" type="radio"/> Trivial</li> <li><input type="radio"/> Small</li> <li><input type="radio"/> Moderate</li> <li><input type="radio"/> Large</li> <li><input type="radio"/> Varies</li> <li><input type="radio"/> Don't know</li> </ul> | <p><b>Desirable effects</b><br/>Small improvement in short-term (~2-3 months) QoL<br/>PCO2</p> <p><b>Undesirable effects</b></p> <p><b>Little to no effect</b><br/>Sleep quality<br/>Exercise tolerance</p> <p><b>Unknown</b><br/>Mortality<br/>Hospitalizations<br/>Exacerbations</p> |                           |

## Undesirable Effects

How substantial are the undesirable anticipated effects?

| JUDGEMENT                                                                                                                                                                                                                                                                                    | RESEARCH EVIDENCE                                                                                                                                                                                                                                                                      | ADDITIONAL CONSIDERATIONS                                                                                                                                                                                                                                                                    |
|----------------------------------------------------------------------------------------------------------------------------------------------------------------------------------------------------------------------------------------------------------------------------------------------|----------------------------------------------------------------------------------------------------------------------------------------------------------------------------------------------------------------------------------------------------------------------------------------|----------------------------------------------------------------------------------------------------------------------------------------------------------------------------------------------------------------------------------------------------------------------------------------------|
| <ul style="list-style-type: none"> <li><input type="radio"/> Large</li> <li><input type="radio"/> Moderate</li> <li><input type="radio"/> Small</li> <li><input checked="" type="radio"/> Trivial</li> <li><input type="radio"/> Varies</li> <li><input type="radio"/> Don't know</li> </ul> | <p><b>Desirable effects</b><br/>Small improvement in short-term (~2-3 months) QoL<br/>PCO2</p> <p><b>Undesirable effects</b></p> <p><b>Little to no effect</b><br/>Sleep quality<br/>Exercise tolerance</p> <p><b>Unknown</b><br/>Mortality<br/>Hospitalizations<br/>Exacerbations</p> | <p>Potential harms not included in short-term studies included in meta-analysis.</p> <p>Theoretical risk of large leaks and hypoventilation with auto-titrating modes which may not be evident in short-term studies. Risks of impacting mortality, hospitalizations, and exacerbations.</p> |

## Certainty of evidence

What is the overall certainty of the evidence of effects?

| JUDGEMENT                                                                                                                                                                                                                                                     | RESEARCH EVIDENCE                                  | ADDITIONAL CONSIDERATIONS                                                                             |
|---------------------------------------------------------------------------------------------------------------------------------------------------------------------------------------------------------------------------------------------------------------|----------------------------------------------------|-------------------------------------------------------------------------------------------------------|
| <ul style="list-style-type: none"> <li><input type="radio"/> Very low</li> <li><input checked="" type="radio"/> Low</li> <li><input type="radio"/> Moderate</li> <li><input type="radio"/> High</li> <li><input type="radio"/> No included studies</li> </ul> | <p>Generally low certainty of pooled evidence.</p> | <p>Substantial uncertainty about the effectiveness across algorithms, machines, makes and models.</p> |

## Values

Is there important uncertainty about or variability in how much people value the main outcomes?

| JUDGEMENT                                                                                                                                                                                                                                                                                                                                              | RESEARCH EVIDENCE                                                                                                                                                                                    | ADDITIONAL CONSIDERATIONS |
|--------------------------------------------------------------------------------------------------------------------------------------------------------------------------------------------------------------------------------------------------------------------------------------------------------------------------------------------------------|------------------------------------------------------------------------------------------------------------------------------------------------------------------------------------------------------|---------------------------|
| <ul style="list-style-type: none"><li><input type="radio"/> Important uncertainty or variability</li><li><input checked="" type="radio"/> Possibly important uncertainty or variability</li><li><input type="radio"/> Probably no important uncertainty or variability</li><li><input type="radio"/> No important uncertainty or variability</li></ul> | Exacerbations, dyspnea, and quality of life are among the most important outcomes in patients with COPD. Symptom relief was generally found to be more important than adverse events. PMID: 30002103 |                           |

## Balance of effects

Does the balance between desirable and undesirable effects favor the intervention or the comparison?

| JUDGEMENT                                                                                                                                                                                                                                                                                                                                                                                                                                                     | RESEARCH EVIDENCE | ADDITIONAL CONSIDERATIONS                                                                                                                                                                                                                                                                                                                         |
|---------------------------------------------------------------------------------------------------------------------------------------------------------------------------------------------------------------------------------------------------------------------------------------------------------------------------------------------------------------------------------------------------------------------------------------------------------------|-------------------|---------------------------------------------------------------------------------------------------------------------------------------------------------------------------------------------------------------------------------------------------------------------------------------------------------------------------------------------------|
| <ul style="list-style-type: none"><li><input type="radio"/> Favors the comparison</li><li><input type="radio"/> Probably favors the comparison</li><li><input checked="" type="radio"/> Does not favor either the intervention or the comparison</li><li><input type="radio"/> Probably favors the intervention</li><li><input type="radio"/> Favors the intervention</li><li><input type="radio"/> Varies</li><li><input type="radio"/> Don't know</li></ul> |                   | <p>Auto-titrating modes may be more beneficial in those in the setting of exacerbation or in the time of titration when trying to decide on levels of support.</p> <p>Despite possible improvement in short-term QOL, there is no clear benefit to use overall, and ongoing safety concerns about leaks and hypoventilation in the long-term.</p> |

## Resources required

How large are the resource requirements (costs)?

| JUDGEMENT                                                                                                                                                                                                                                                                                                                                                                     | RESEARCH EVIDENCE | ADDITIONAL CONSIDERATIONS                                                                                                                                                                                                                     |
|-------------------------------------------------------------------------------------------------------------------------------------------------------------------------------------------------------------------------------------------------------------------------------------------------------------------------------------------------------------------------------|-------------------|-----------------------------------------------------------------------------------------------------------------------------------------------------------------------------------------------------------------------------------------------|
| <ul style="list-style-type: none"><li><input type="radio"/> Large costs</li><li><input type="radio"/> Moderate costs</li><li><input type="radio"/> Negligible costs and savings</li><li><input type="radio"/> Moderate savings</li><li><input type="radio"/> Large savings</li><li><input checked="" type="radio"/> Varies</li><li><input type="radio"/> Don't know</li></ul> |                   | It will cost more to upgrade from an existing machine. For a new machine, the price of a ventilator with these capabilities will vary, but could be anything from no extra cost to expensive depending on make, model, funding strategy, etc. |



## Certainty of evidence of required resources

What is the certainty of the evidence of resource requirements (costs)?

| JUDGEMENT                                                                                                                                                                                                                                               | RESEARCH EVIDENCE | ADDITIONAL CONSIDERATIONS         |
|---------------------------------------------------------------------------------------------------------------------------------------------------------------------------------------------------------------------------------------------------------|-------------------|-----------------------------------|
| <ul style="list-style-type: none"><li><input type="radio"/> Very low</li><li><input type="radio"/> Low</li><li><input type="radio"/> Moderate</li><li><input type="radio"/> High</li><li><input checked="" type="radio"/> No included studies</li></ul> |                   | No real evidence to address cost. |

## Cost effectiveness

Does the cost-effectiveness of the intervention favor the intervention or the comparison?

| JUDGEMENT                                                                                                                                                                                                                                                                                                                                                                                                                                                              | RESEARCH EVIDENCE | ADDITIONAL CONSIDERATIONS                                                                                                   |
|------------------------------------------------------------------------------------------------------------------------------------------------------------------------------------------------------------------------------------------------------------------------------------------------------------------------------------------------------------------------------------------------------------------------------------------------------------------------|-------------------|-----------------------------------------------------------------------------------------------------------------------------|
| <ul style="list-style-type: none"><li><input type="radio"/> Favors the comparison</li><li><input type="radio"/> Probably favors the comparison</li><li><input type="radio"/> Does not favor either the intervention or the comparison</li><li><input type="radio"/> Probably favors the intervention</li><li><input type="radio"/> Favors the intervention</li><li><input type="radio"/> Varies</li><li><input checked="" type="radio"/> No included studies</li></ul> |                   | Given lack of evidence for benefits and harms, lack of certainty around costs it is difficult to assess cost-effectiveness. |

## Equity

What would be the impact on health equity?

| JUDGEMENT                                                                                                                                                                     | RESEARCH EVIDENCE | ADDITIONAL CONSIDERATIONS                                                                                                                                                                           |
|-------------------------------------------------------------------------------------------------------------------------------------------------------------------------------|-------------------|-----------------------------------------------------------------------------------------------------------------------------------------------------------------------------------------------------|
| <ul style="list-style-type: none"><li><input type="radio"/> Reduced</li><li><input type="radio"/> Probably reduced</li><li><input type="radio"/> Probably no impact</li></ul> |                   | Cost is higher so implementing these modes may increase inequity, heightening disparities between those with financial resources and those without. May reduce inequity as patients who do not have |

|                                                                                                                                                            |  |                                                                                                                                                                         |
|------------------------------------------------------------------------------------------------------------------------------------------------------------|--|-------------------------------------------------------------------------------------------------------------------------------------------------------------------------|
| <input type="radio"/> Probably increased<br><input type="radio"/> Increased<br><input checked="" type="radio"/> Varies<br><input type="radio"/> Don't know |  | access to a sleep laboratory to titrate NIV may benefit from some titration of NIV settings, though this question has not been studied in the existing clinical trials. |
|------------------------------------------------------------------------------------------------------------------------------------------------------------|--|-------------------------------------------------------------------------------------------------------------------------------------------------------------------------|

## Acceptability

Is the intervention acceptable to key stakeholders?

| JUDGEMENT                                                                                                                                                                                                       | RESEARCH EVIDENCE                                                                                                                                                                                                                                                                                                                                                                                                                                                                                                                   | ADDITIONAL CONSIDERATIONS                                                                                         |
|-----------------------------------------------------------------------------------------------------------------------------------------------------------------------------------------------------------------|-------------------------------------------------------------------------------------------------------------------------------------------------------------------------------------------------------------------------------------------------------------------------------------------------------------------------------------------------------------------------------------------------------------------------------------------------------------------------------------------------------------------------------------|-------------------------------------------------------------------------------------------------------------------|
| <input type="radio"/> No<br><input type="radio"/> Probably no<br><input type="radio"/> Probably yes<br><input checked="" type="radio"/> Yes<br><input type="radio"/> Varies<br><input type="radio"/> Don't know | Compliance between adaptive VTPCV and conventional NIV were not significantly different in 5 studies (Crisafulli 2009, Oscroft 2010, Oscroft 2014, Ekkernkamp 2014, Storre 2014) which used data directly from the NIV devices. Patient self-reported tolerance was not significantly different in 2 studies (Oscroft 2010, Storre 2014). Self-reported comfort was not different in 2 studies (Crisafulli 2009, Oscroft 2010). One study (Nilius 2017) used a questionnaire to assess acceptability, again finding no differences. | Overall doesn't seem to be any differences in acceptability of these modes vs. conventional fixed pressure modes. |

## Feasibility

Is the intervention feasible to implement?

| JUDGEMENT                                                                                                                                                                                                       | RESEARCH EVIDENCE | ADDITIONAL CONSIDERATIONS                                                                            |
|-----------------------------------------------------------------------------------------------------------------------------------------------------------------------------------------------------------------|-------------------|------------------------------------------------------------------------------------------------------|
| <input type="radio"/> No<br><input type="radio"/> Probably no<br><input type="radio"/> Probably yes<br><input checked="" type="radio"/> Yes<br><input type="radio"/> Varies<br><input type="radio"/> Don't know |                   | Probably feasible, if ventilators already have these modes included. If not, would be less feasible. |

## SUMMARY OF JUDGEMENTS

|                       | JUDGEMENT                            |                                               |                                                  |                                         |  |        |                     |
|-----------------------|--------------------------------------|-----------------------------------------------|--------------------------------------------------|-----------------------------------------|--|--------|---------------------|
| PROBLEM               | No                                   | Probably no                                   | Probably yes                                     | Yes                                     |  | Varies | Don't know          |
| DESIRABLE EFFECTS     | Trivial                              | Small                                         | Moderate                                         | Large                                   |  | Varies | Don't know          |
| UNDESIRABLE EFFECTS   | Large                                | Moderate                                      | Small                                            | Trivial                                 |  | Varies | Don't know          |
| CERTAINTY OF EVIDENCE | Very low                             | Low                                           | Moderate                                         | High                                    |  |        | No included studies |
| VALUES                | Important uncertainty or variability | Possibly important uncertainty or variability | Probably no important uncertainty or variability | No important uncertainty or variability |  |        |                     |
|                       |                                      |                                               | Does not favor                                   |                                         |  |        |                     |

|                                                    |                       |                                |                                                          |                                  |                         |               |                            |
|----------------------------------------------------|-----------------------|--------------------------------|----------------------------------------------------------|----------------------------------|-------------------------|---------------|----------------------------|
| <b>BALANCE OF EFFECTS</b>                          | Favors the comparison | Probably favors the comparison | <b>either the intervention or the comparison</b>         | Probably favors the intervention | Favors the intervention | Varies        | Don't know                 |
| <b>RESOURCES REQUIRED</b>                          | Large costs           | Moderate costs                 | Negligible costs and savings                             | Moderate savings                 | Large savings           | <b>Varies</b> | Don't know                 |
| <b>CERTAINTY OF EVIDENCE OF REQUIRED RESOURCES</b> | Very low              | Low                            | Moderate                                                 | High                             |                         |               | <b>No included studies</b> |
| <b>COST EFFECTIVENESS</b>                          | Favors the comparison | Probably favors the comparison | Does not favor either the intervention or the comparison | Probably favors the intervention | Favors the intervention | Varies        | <b>No included studies</b> |
| <b>EQUITY</b>                                      | Reduced               | Probably reduced               | Probably no impact                                       | Probably increased               | Increased               | <b>Varies</b> | Don't know                 |
| <b>ACCEPTABILITY</b>                               | No                    | Probably no                    | Probably yes                                             | <b>Yes</b>                       |                         | Varies        | Don't know                 |
| <b>FEASIBILITY</b>                                 | No                    | Probably no                    | Probably yes                                             | <b>Yes</b>                       |                         | Varies        | Don't know                 |

## TYPE OF RECOMMENDATION

|                                                     |                                                                 |                                                                               |                                                      |                                                 |
|-----------------------------------------------------|-----------------------------------------------------------------|-------------------------------------------------------------------------------|------------------------------------------------------|-------------------------------------------------|
| Strong recommendation against the intervention<br>○ | <b>Conditional recommendation against the intervention</b><br>● | Conditional recommendation for either the intervention or the comparison<br>○ | Conditional recommendation for the intervention<br>○ | Strong recommendation for the intervention<br>○ |
|-----------------------------------------------------|-----------------------------------------------------------------|-------------------------------------------------------------------------------|------------------------------------------------------|-------------------------------------------------|

## CONCLUSIONS

### Recommendation

The ERS TF suggests using fixed pressure support mode as first-choice ventilator mode in patients with COPD using long-term NIV (conditional recommendation, very low certainty evidence).

### Justification

While there may be benefits based upon the included short-term studies, further research is needed to demonstrate safety, especially given potential safety concerns

about dynamic auto-changes of the ventilator resulting in leaks or hypoventilation. Given that virtually all studies in other questions (PICO 1, 2, 3) used fixed-pressure modes, and that the PICO recommendations are thus based upon studies using this mode, it is unclear if the existing evidence would also apply to ventilators using these auto-titrating modes. Lastly, changing to these auto-modes may require purchase or exchange of new ventilators, reducing feasibility. While these modes may theoretically be useful to titrate without monitoring, until the safety of such approach is demonstrated the risks of unmonitored titration are unclear and this is not recommended.

Overall, given the uncertainty of long-term benefits, difficulty applying the evidence and recommendations from PICOs 1-3, the panel made a conditional recommendation against using auto-titrating modes as the initial mode of ventilation. However, conditional recommendation also means there may be some circumstances where these modes are considered for use, though the panel did not identify any such situations.

## Subgroup considerations

## Implementation considerations

## Monitoring and evaluation

## Research priorities

- 1) The role of adaptive/auto-titrating modes to improve the long-term outcome of COPD, acute exacerbation vs chronic stable hypercapnic COPD and optimization of overnight ventilation, especially in specific subgroups in which ventilatory requirements may vary substantially overnight.
- 2) The assessment of auto-EPAP modes (in addition to adaptive/auto-titrating modes) in the sub-group of patients with COPD-OSA overlap syndrome
- 3) The clinical efficacy and cost effectiveness of auto-titrating modes in the inpatient vs outpatient settings avoiding the need for hospitalization to initiate NIV, thereby increasing access to NIV.
