# Supplementary material
Source: HighWire-hosted journal article supplement (https://erj.ersjournals.com/content/54/3/1901003)
Supplement: inline-supplementary-material-6 [file inline-supplementary-material-6.pdf]

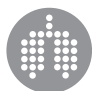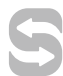

SHAREABLE PDF

# European Respiratory Society guidelines on long-term home non-invasive ventilation for management of COPD

Begum Ergan <sup>1,23</sup>, Simon Oczkowski<sup>2,3,23</sup>, Bram Rochweg<sup>2,3</sup>, Annalisa Carlucci<sup>4</sup>, Michelle Chatwin<sup>5</sup>, Enrico Clini <sup>6</sup>, Mark Elliott<sup>7</sup>, Jesus Gonzalez-Bermejo<sup>8,9</sup>, Nicholas Hart <sup>10,11</sup>, Manel Lujan<sup>12</sup>, Jacek Nasilowski<sup>13</sup>, Stefano Nava<sup>14</sup>, Jean Louis Pepin<sup>15</sup>, Lara Pisani<sup>14</sup>, Jan Hendrik Storre<sup>16,17</sup>, Peter Wijkstra<sup>18</sup>, Thomy Tonia<sup>19</sup>, Jeanette Boyd<sup>20</sup>, Raffaele Scala<sup>21</sup> and Wolfram Windisch<sup>22</sup>

**Affiliations:** <sup>1</sup>Dept of Pulmonary and Critical Care, Dokuz Eylul University School of Medicine, Izmir, Turkey. <sup>2</sup>Dept of Medicine, Division of Critical Care, McMaster University, Hamilton, ON, Canada. <sup>3</sup>Dept of Health Research Methods, Evidence, and Impact, McMaster University, Hamilton, ON, Canada. <sup>4</sup>Dept of Pulmonary Rehabilitation, IRCCS-Istituto Clinico Scientifici, Pavia, Italy. <sup>5</sup>Clinical and Academic Dept of Sleep and Breathing, Royal Brompton Hospital, Royal Brompton and Harefield NHS Foundation Trust, London, UK. <sup>6</sup>Dept of Medical and Surgical Sciences, University of Modena and Reggio Emilia and University Hospital of Modena, Modena, Italy. <sup>7</sup>Dept of Respiratory Medicine, St James's University Hospital, Leeds, UK. <sup>8</sup>Sorbonne Université, INSERM, UMRS1158 Neurophysiologie Respiratoire Expérimentale et Clinique, Paris, France. <sup>9</sup>AP-HP, Groupe Hospitalier Pitié-Salpêtrière Charles Foix, Service de Pneumologie et Réanimation Médicale du Département R3S, Paris, France. <sup>10</sup>Lane Fox Respiratory Service, Guy's and St Thomas' NHS Foundation, London, UK. <sup>11</sup>Centre for Human and Applied Physiological Science, Faculty of Life Sciences and Medicine, School of Basic and Medical BioSciences, Kings College London, London, UK. <sup>12</sup>Service of Pneumology, Hospital de Sabadell Corporació Parc Taulí, Universitat Autònoma de Barcelona, Centro de investigación Biomédica en Red (CIBERES), Sabadell, Spain. <sup>13</sup>Dept of Internal Medicine, Pulmonary Diseases and Allergy, Medical University of Warsaw, Warsaw, Poland. <sup>14</sup>Dept of Clinical, Integrated and Experimental Medicine (DIMES), Respiratory and Critical Care Unit, S. Orsola-Malpighi Hospital, Alma Mater University, Bologna, Italy. <sup>15</sup>HP2 Laboratory, INSERM U1042, Univ. Grenoble Alpes, and EFCR laboratory, Grenoble Alpes University Hospital, Grenoble, France. <sup>16</sup>Dept of Intensive Care, Sleep Medicine and Mechanical Ventilation, Asklepios Fachkliniken Munich-Gauting, Gauting, Germany. <sup>17</sup>Dept of Pneumology, University Medical Hospital, Freiburg, Germany. <sup>18</sup>Dept of Pulmonary Diseases/Home Mechanical Ventilation, University of Groningen, University Medical Center Groningen, Groningen, The Netherlands. <sup>19</sup>Institute of Social and Preventive Medicine, University of Bern, Bern, Switzerland. <sup>20</sup>European Lung Foundation (ELF), Sheffield, UK. <sup>21</sup>Dept of Pulmonology and Respiratory Intensive Care Unit, S. Donato Hospital, Arezzo, Italy. <sup>22</sup>Dept of Pneumology, Cologne Merheim Hospital, Kliniken der Stadt Köln gGmbH, Witten/Herdecke University, Cologne, Germany. <sup>23</sup>The first two authors contributed equally.

**Correspondence:** Raffaele Scala, Dept of Pulmonology and Respiratory Intensive Care Unit, S. Donato Hospital, Arezzo, Italy. Email: raffaele\_scala@hotmail.com

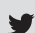

@ERSpublications

**Managing hypercapnia may be an important intervention for improving outcome of COPD patients with chronic respiratory failure. Long-term home NIV may improve health outcomes by targeting a reduction in CO<sub>2</sub> in those with hypercapnic respiratory failure.** <http://bit.ly/2NIA3eG>

**Cite this article as:** Ergan B, Oczkowski S, Rochweg B, *et al.* European Respiratory Society guidelines on long-term home non-invasive ventilation for management of COPD. *Eur Respir J* 2019; 54: 1901003 [<https://doi.org/10.1183/13993003.01003-2019>].

This single-page version can be shared freely online.

## ABSTRACT

**Background:** While the role of acute non-invasive ventilation (NIV) has been shown to improve outcome in acute life-threatening hypercapnic respiratory failure in COPD, the evidence of clinical efficacy of long-term home NIV (LTH-NIV) for management of COPD is less. This document provides evidence-based

recommendations for the clinical application of LTH-NIV in chronic hypercapnic COPD patients.

**Materials and methods:** The European Respiratory Society task force committee was composed of clinicians, methodologists and experts in the field of LTH-NIV. The committee developed recommendations based on the GRADE (Grading, Recommendation, Assessment, Development and Evaluation) methodology. The GRADE Evidence to Decision framework was used to formulate recommendations. A number of topics were addressed under a narrative format which provides a useful context for clinicians and patients.

**Results:** The task force committee delivered conditional recommendations for four actionable PICO (target population-intervention-comparator-outcome) questions, 1) suggesting for the use of LTH-NIV in stable hypercapnic COPD; 2) suggesting for the use of LTH-NIV in COPD patients following a COPD exacerbation requiring acute NIV 3) suggesting for the use of NIV settings targeting a reduction in carbon dioxide and 4) suggesting for using fixed pressure support as first choice ventilator mode.

**Conclusions:** Managing hypercapnia may be an important intervention for improving the health outcome of COPD patients with chronic respiratory failure. The task force conditionally supports the application of LTH-NIV to improve health outcome by targeting a reduction in carbon dioxide in COPD patients with persistent hypercapnic respiratory failure. These recommendations should be applied in clinical practice by practitioners that routinely care for chronic hypercapnic COPD patients.
